# Supplementary material for: Skin vasculature and hair follicle cross-talking associated with stem cell activation and tissue homeostasis
Source: eLife journal article supplement (doi:10.7554/elife.45977), 2019-07-25
Supplement: supp [file elife-45977-supp-v1.zip]

Archive with 14 entries (14 files):
- elife_poa_e45977_Figure_2_source_data_2.xlsx
- elife_poa_e45977_Figure_8_source_data_1.xlsx
- elife_poa_e45977_Figure_4_figure_supplement_1.ai
- elife_poa_e45977_Figure_2_source_data_3.xlsx
- elife_poa_e45977_Figure_1_figure_supplement_1.ai
- elife_poa_e45977_Figure_2_source_data_1.xlsx
- elife_poa_e45977_Figure_5_figure_supplement_1.tif
- elife_poa_e45977_Figure_3_source_data_1.xlsx
- elife_poa_e45977_Figure_8_figure_supplement_1.ai
- elife_poa_e45977_Figure_8_source_data_2.xlsx
- elife_poa_e45977_Figure_6_figure_supplement_1.ai
- elife_poa_e45977_Figure_6_source_data_1.xlsx
- elife_poa_e45977_Figure_5_source_data_1.xlsx
- elife_poa_e45977_Transparent_Reporting_File.pdf
