# Supplementary material for: Skin vasculature and hair follicle cross-talking associated with stem cell activation and tissue homeostasis
Source: eLife journal article supplement (doi:10.7554/elife.45977), 2019-07-25
Supplement: supp [file elife-45977-supp-v1.zip › elife_poa_e45977_Figure_2_source_data_1.xlsx]

## Sheet: Sheet1
	PD19 F284.01 F				PD19 F284.02 M				PD19 F320.04 F
		area	count			area	count			area	count
	img1	6.97	46		img1 (old)	5.51	40		img1	4.503	77						3 mice						All images
	img2	6.42	41		img3 (old)	3.21	36		img2	3.123	74							Mean	SD	N			Mean	SD	N
	img3	2.94	58		img4 (old)	4.727	44		img3	4.093	68						PD19	4.65247	0.361895	3		PD19	4.65247	1.29492	15
	img4	4.45	60		img5 (old)	3.675	74		img4	5.955	60						PD20	3.8609	0.224719	2		PD20	3.8609	0.640565	10
	img5	4.201	64		img1	6.31	32		img5	3.7	58						PD21	4.9305	1.63061	3		PD21	4.9305	1.83073	20
																	PD28	8.96427	1.57541	3		PD28	8.96427	1.86799	15
	Mean	SD	N		Mean	SD	N		Mean	SD	N
	4.9962	1.66446	5		4.6864	1.27659	5		4.2748	1.06832	5
	PD20 F284.03 F				PD20 F320.09 F
		area	count			area	count
	img1	3.46	38		img1	3.953	53
	img2	4.8	58		img2	4.757	83
	img3	4.3	23		img3	3.209	85
	img4	3.462	71		img4	3.729	63
	img5	4.077	89		img5	2.862	60
	Mean	SD	N		Mean	SD	N
	4.0198	0.57337	5		3.702	0.728938	5
	PD21 E305.03 F				PD21 F305.01 F				PD21 F283.02 F				PD21 F283.01 F
		area	count			area	count			area	count			area	count
	img1	9.13	50		img1	7.97	56		img1	3.816	49		img1	4.007	70
	img2	5.87	49		img2	6.527	63		img2	2.583	98		img2	2.583	91
	img3	7.02	58		img3	7.271	61		img3	3.04	75		img4	3.931	108
	img4	4.385	47		img4	4.884	43		img4	3.489	72		img5	3.878	88				From inch to pixel: raw number x 9210.2405
	img5	5.43	51		img5	4.852	70		img5	3.61	53		img1 old	4.334	74
	Mean	SD	N		Mean	SD	N		Mean	SD	N		Mean	SD	N
	6.367	1.81065	5		6.3008	1.40401	5		3.3076	0.494843	5		3.7466	0.674181	5
	PD28 F283.03 M				PD28 F283.04 F				PD28 F305.04 F										Pixels all images
		area	count			area	count			area	count									Mean	SD	N
	img1	8.895	79		img1 (1010)	7.498	90		img1	8.03	27								PD19	42850.3	11926.5	15
	img2	9.795	81		img2 (1010)	11.878	58		img2	7.24	48								PD20	35559.8	5899.76	10
	img3	10.071	112		img3 (1010)	12.906	77		img3	6.81	29								PD21	45411.1	16861.5	20
	img4	9.117	90		img5 (1010)	9.019	58		img4	7.161	71								PD28	82563.1	17204.6	15
	img5	7.515	130		img1	11.096	84		img5	7.433	89
	Mean	SD	N		Mean	SD	N		Mean	SD	N
	9.0786	0.997261	5		10.4794	2.19352	5		7.3348	0.44932	5
