# Supplementary material for: Skin vasculature and hair follicle cross-talking associated with stem cell activation and tissue homeostasis
Source: eLife journal article supplement (doi:10.7554/elife.45977), 2019-07-25
Supplement: supp [file elife-45977-supp-v1.zip › elife_poa_e45977_Figure_2_source_data_2.xlsx]

## Sheet: BV during hair cycle - JMP
Mouse ID	Age	HPuHG BV
F284.01	PD19	10856
F284.01	PD19	8522
F284.01	PD19	11119
F284.01	PD19	7151
F284.01	PD19	8021
F320.04	PD19	6367
F320.04	PD19	4854
F320.04	PD19	7894
F320.04	PD19	6198
F320.04	PD19	8406
F320.06	PD19	4561
F320.06	PD19	3846
F320.06	PD19	5821
F320.06	PD19	4422
F320.06	PD19	5164
F284.03	PD20	12539
F284.03	PD20	14895
F284.03	PD20	12527
F284.03	PD20	10995
F284.03	PD20	9726
F320.09	PD20	8642
F320.09	PD20	8656
F320.09	PD20	5296
F320.09	PD20	7063
F320.09	PD20	7479
F284.04	PD20	8934
F284.04	PD20	8857
F284.04	PD20	11708
F284.04	PD20	6371
F284.04	PD20	8740
F283.01	PD21	7655
F283.01	PD21	4961
F283.01	PD21	5312
F283.01	PD21	6340
F283.01	PD21	5625
F283.02	PD21	2708
F283.02	PD21	3000
F283.02	PD21	2342
F283.02	PD21	5596
F283.02	PD21	4677
F305.01	PD21	6891
F305.01	PD21	5853
F305.01	PD21	5344
F305.01	PD21	5284
F305.01	PD21	5186
