# Supplementary material for: Skin vasculature and hair follicle cross-talking associated with stem cell activation and tissue homeostasis
Source: eLife journal article supplement (doi:10.7554/elife.45977), 2019-07-25
Supplement: supp [file elife-45977-supp-v1.zip › elife_poa_e45977_Figure_2_source_data_3.xlsx]

## Sheet: Sheet1
Age	Mouse ID	Img ID	Angles
PD19	F284.01	img1	0
PD19	F284.01	img1	0
PD19	F284.01	img1	0
PD19	F284.01	img1	2
PD19	F284.01	img1	2
PD19	F284.01	img1	2
PD19	F284.01	img1	2
PD19	F284.01	img1	2
PD19	F284.01	img1	3
PD19	F284.01	img1	3
PD19	F284.01	img1	3
PD19	F284.01	img1	4
PD19	F284.01	img1	4
PD19	F284.01	img1	5
PD19	F284.01	img1	5
PD19	F284.01	img1	5
PD19	F284.01	img1	5
PD19	F284.01	img1	6
PD19	F284.01	img1	6
PD19	F284.01	img1	7
PD19	F284.01	img1	7
PD19	F284.01	img1	7
PD19	F284.01	img1	9
PD19	F284.01	img1	10
PD19	F284.01	img1	10
PD19	F284.01	img1	11
PD19	F284.01	img1	16
PD19	F284.01	img1	18
PD19	F284.01	img1	18
PD19	F284.01	img1	20
PD19	F284.01	img1	20
PD19	F284.01	img1	24
PD19	F284.01	img1	25
PD19	F284.01	img1	25
PD19	F284.01	img1	25
PD19	F284.01	img1	27
PD19	F284.01	img1	27
PD19	F284.01	img1	28
PD19	F284.01	img1	29
PD19	F284.01	img1	33
PD19	F284.01	img1	36
PD19	F284.01	img1	44
PD19	F284.01	img1	64
PD19	F284.01	img1	72
PD19	F284.01	img1	40
PD19	F284.01	img1	22
PD19	F284.01	img1	19
PD19	F284.01	img2	0
PD19	F284.01	img2	0
PD19	F284.01	img2	0
PD19	F284.01	img2	0
PD19	F284.01	img2	1
PD19	F284.01	img2	1
PD19	F284.01	img2	1
PD19	F284.01	img2	1
PD19	F284.01	img2	1
PD19	F284.01	img2	2
PD19	F284.01	img2	2
PD19	F284.01	img2	3
PD19	F284.01	img2	5
PD19	F284.01	img2	5
PD19	F284.01	img2	7
PD19	F284.01	img2	8
PD19	F284.01	img2	8
PD19	F284.01	img2	8
PD19	F284.01	img2	9
PD19	F284.01	img2	10
PD19	F284.01	img2	10
PD19	F284.01	img2	10
PD19	F284.01	img2	11
PD19	F284.01	img2	11
PD19	F284.01	img2	12
PD19	F284.01	img2	13
PD19	F284.01	img2	13
PD19	F284.01	img2	13
PD19	F284.01	img2	14
PD19	F284.01	img2	14
PD19	F284.01	img2	14
PD19	F284.01	img2	16
PD19	F284.01	img2	16
PD19	F284.01	img2	19
PD19	F284.01	img2	22
PD19	F284.01	img2	23
PD19	F284.01	img2	25
PD19	F284.01	img2	25
PD19	F284.01	img2	25
PD19	F284.01	img2	28
PD19	F284.01	img2	29
PD19	F284.01	img2	29
PD19	F284.01	img2	30
PD19	F284.01	img2	31
PD19	F284.01	img2	33
PD19	F284.01	img2	37
PD19	F284.01	img2	37
PD19	F284.01	img2	37
PD19	F284.01	img2	38
PD19	F284.01	img2	38
PD19	F284.01	img2	39
PD19	F284.01	img2	43
PD19	F284.01	img2	44
PD19	F284.01	img2	48
PD19	F284.01	img2	62
PD19	F284.01	img2	68
PD19	F284.01	img2	70
PD19	F284.01	img2	88
PD19	F284.01	img2	90
PD19	F284.01	img2	81
PD19	F284.01	img2	77
PD19	F284.01	img2	73
PD19	F284.01	img2	72
PD19	F284.01	img2	70
PD19	F284.01	img2	40
PD19	F284.01	img2	16
PD19	F284.01	img2	16
PD19	F284.01	img2	10
PD19	F284.01	img3	0
PD19	F284.01	img3	0
PD19	F284.01	img3	1
PD19	F284.01	img3	2
PD19	F284.01	img3	2
PD19	F284.01	img3	2
PD19	F284.01	img3	3
PD19	F284.01	img3	3
PD19	F284.01	img3	3
PD19	F284.01	img3	4
PD19	F284.01	img3	5
PD19	F284.01	img3	5
PD19	F284.01	img3	5
PD19	F284.01	img3	5
PD19	F284.01	img3	5
PD19	F284.01	img3	6
PD19	F284.01	img3	6
PD19	F284.01	img3	7
PD19	F284.01	img3	7
PD19	F284.01	img3	8
PD19	F284.01	img3	8
PD19	F284.01	img3	9
PD19	F284.01	img3	10
PD19	F284.01	img3	10
PD19	F284.01	img3	10
PD19	F284.01	img3	10
PD19	F284.01	img3	12
PD19	F284.01	img3	12
PD19	F284.01	img3	12
PD19	F284.01	img3	12
PD19	F284.01	img3	13
PD19	F284.01	img3	13
PD19	F284.01	img3	17
PD19	F284.01	img3	17
PD19	F284.01	img3	18
PD19	F284.01	img3	19
PD19	F284.01	img3	22
PD19	F284.01	img3	22
PD19	F284.01	img3	22
PD19	F284.01	img3	22
PD19	F284.01	img3	25
PD19	F284.01	img3	28
PD19	F284.01	img3	29
PD19	F284.01	img3	37
PD19	F284.01	img3	38
PD19	F284.01	img3	40
PD19	F284.01	img3	46
PD19	F284.01	img3	31
PD19	F284.01	img3	28
PD19	F284.01	img4	0
PD19	F284.01	img4	0
PD19	F284.01	img4	1
PD19	F284.01	img4	1
PD19	F284.01	img4	2
PD19	F284.01	img4	2
PD19	F284.01	img4	3
PD19	F284.01	img4	4
PD19	F284.01	img4	4
PD19	F284.01	img4	5
PD19	F284.01	img4	6
PD19	F284.01	img4	6
PD19	F284.01	img4	6
PD19	F284.01	img4	7
PD19	F284.01	img4	7
PD19	F284.01	img4	7
PD19	F284.01	img4	8
PD19	F284.01	img4	9
PD19	F284.01	img4	9
PD19	F284.01	img4	9
PD19	F284.01	img4	9
PD19	F284.01	img4	10
PD19	F284.01	img4	11
PD19	F284.01	img4	11
PD19	F284.01	img4	12
PD19	F284.01	img4	12
PD19	F284.01	img4	12
PD19	F284.01	img4	13
PD19	F284.01	img4	14
PD19	F284.01	img4	15
PD19	F284.01	img4	16
PD19	F284.01	img4	18
PD19	F284.01	img4	19
PD19	F284.01	img4	20
PD19	F284.01	img4	21
PD19	F284.01	img4	21
PD19	F284.01	img4	22
PD19	F284.01	img4	22
PD19	F284.01	img4	23
PD19	F284.01	img4	24
PD19	F284.01	img4	25
PD19	F284.01	img4	25
PD19	F284.01	img4	27
PD19	F284.01	img4	27
PD19	F284.01	img4	28
PD19	F284.01	img4	30
PD19	F284.01	img4	31
PD19	F284.01	img4	31
PD19	F284.01	img4	35
PD19	F284.01	img4	36
PD19	F284.01	img4	36
PD19	F284.01	img4	37
PD19	F284.01	img4	40
PD19	F284.01	img4	42
PD19	F284.01	img4	43
PD19	F284.01	img4	49
PD19	F284.01	img4	54
PD19	F284.01	img4	68
PD19	F284.01	img4	69
PD19	F284.01	img4	75
PD19	F284.01	img4	78
PD19	F284.01	img4	79
PD19	F284.01	img4	85
PD19	F284.01	img4	86
PD19	F284.01	img4	88
PD19	F284.01	img4	86
PD19	F284.01	img4	47
PD19	F284.01	img4	34
PD19	F284.01	img4	22
PD19	F284.01	img4	15
PD19	F284.01	img5	1
PD19	F284.01	img5	1
PD19	F284.01	img5	1
PD19	F284.01	img5	1
PD19	F284.01	img5	2
PD19	F284.01	img5	2
PD19	F284.01	img5	2
PD19	F284.01	img5	2
PD19	F284.01	img5	3
PD19	F284.01	img5	3
PD19	F284.01	img5	3
PD19	F284.01	img5	3
PD19	F284.01	img5	3
PD19	F284.01	img5	4
PD19	F284.01	img5	4
PD19	F284.01	img5	4
PD19	F284.01	img5	5
PD19	F284.01	img5	5
PD19	F284.01	img5	6
PD19	F284.01	img5	6
PD19	F284.01	img5	6
PD19	F284.01	img5	6
PD19	F284.01	img5	7
PD19	F284.01	img5	7
PD19	F284.01	img5	9
PD19	F284.01	img5	9
PD19	F284.01	img5	9
PD19	F284.01	img5	10
PD19	F284.01	img5	10
PD19	F284.01	img5	11
PD19	F284.01	img5	11
PD19	F284.01	img5	12
PD19	F284.01	img5	13
PD19	F284.01	img5	18
PD19	F284.01	img5	21
PD19	F284.01	img5	21
PD19	F284.01	img5	21
PD19	F284.01	img5	21
PD19	F284.01	img5	22
PD19	F284.01	img5	22
PD19	F284.01	img5	22
PD19	F284.01	img5	23
PD19	F284.01	img5	29
PD19	F284.01	img5	29
PD19	F284.01	img5	34
PD19	F284.01	img5	43
PD19	F284.01	img5	45
PD19	F284.01	img5	47
PD19	F284.01	img5	49
PD19	F284.01	img5	51
PD19	F284.01	img5	55
PD19	F284.01	img5	65
PD19	F284.01	img5	80
PD19	F284.01	img5	82
PD19	F284.01	img5	55
PD19	F284.01	img5	52
PD19	F284.01	img5	68
PD19	F320.04	img1	0
PD19	F320.04	img1	0
PD19	F320.04	img1	0
PD19	F320.04	img1	0
PD19	F320.04	img1	0
PD19	F320.04	img1	1
PD19	F320.04	img1	1
PD19	F320.04	img1	1
PD19	F320.04	img1	1
PD19	F320.04	img1	1
PD19	F320.04	img1	2
PD19	F320.04	img1	2
PD19	F320.04	img1	2
PD19	F320.04	img1	2
PD19	F320.04	img1	3
PD19	F320.04	img1	3
PD19	F320.04	img1	5
PD19	F320.04	img1	6
PD19	F320.04	img1	6
PD19	F320.04	img1	7
PD19	F320.04	img1	7
PD19	F320.04	img1	7
PD19	F320.04	img1	7
PD19	F320.04	img1	8
PD19	F320.04	img1	8
PD19	F320.04	img1	9
PD19	F320.04	img1	11
PD19	F320.04	img1	11
PD19	F320.04	img1	11
PD19	F320.04	img1	12
PD19	F320.04	img1	13
PD19	F320.04	img1	13
PD19	F320.04	img1	13
PD19	F320.04	img1	13
PD19	F320.04	img1	14
PD19	F320.04	img1	14
PD19	F320.04	img1	14
PD19	F320.04	img1	14
PD19	F320.04	img1	15
PD19	F320.04	img1	15
PD19	F320.04	img1	15
PD19	F320.04	img1	16
PD19	F320.04	img1	16
PD19	F320.04	img1	18
PD19	F320.04	img1	18
PD19	F320.04	img1	18
PD19	F320.04	img1	18
PD19	F320.04	img1	19
PD19	F320.04	img1	19
PD19	F320.04	img1	20
PD19	F320.04	img1	20
PD19	F320.04	img1	21
PD19	F320.04	img1	23
PD19	F320.04	img1	24
PD19	F320.04	img1	26
PD19	F320.04	img1	26
PD19	F320.04	img1	27
PD19	F320.04	img1	28
PD19	F320.04	img1	30
PD19	F320.04	img1	30
PD19	F320.04	img1	31
PD19	F320.04	img1	31
PD19	F320.04	img1	31
PD19	F320.04	img1	33
PD19	F320.04	img1	35
PD19	F320.04	img1	35
PD19	F320.04	img1	36
PD19	F320.04	img1	37
PD19	F320.04	img1	39
PD19	F320.04	img1	40
PD19	F320.04	img1	40
PD19	F320.04	img1	42
PD19	F320.04	img1	47
PD19	F320.04	img1	49
PD19	F320.04	img1	52
PD19	F320.04	img1	53
PD19	F320.04	img1	53
PD19	F320.04	img1	55
PD19	F320.04	img1	60
PD19	F320.04	img1	70
PD19	F320.04	img1	74
PD19	F320.04	img1	82
PD19	F320.04	img1	85
PD19	F320.04	img2	1
PD19	F320.04	img2	1
PD19	F320.04	img2	1
PD19	F320.04	img2	1
PD19	F320.04	img2	1
PD19	F320.04	img2	1
PD19	F320.04	img2	2
PD19	F320.04	img2	2
PD19	F320.04	img2	2
PD19	F320.04	img2	3
PD19	F320.04	img2	3
PD19	F320.04	img2	4
PD19	F320.04	img2	5
PD19	F320.04	img2	5
PD19	F320.04	img2	5
PD19	F320.04	img2	6
PD19	F320.04	img2	6
PD19	F320.04	img2	7
PD19	F320.04	img2	7
PD19	F320.04	img2	7
PD19	F320.04	img2	8
PD19	F320.04	img2	8
PD19	F320.04	img2	9
PD19	F320.04	img2	9
PD19	F320.04	img2	9
PD19	F320.04	img2	9
PD19	F320.04	img2	9
PD19	F320.04	img2	9
PD19	F320.04	img2	10
PD19	F320.04	img2	13
PD19	F320.04	img2	14
PD19	F320.04	img2	15
PD19	F320.04	img2	15
PD19	F320.04	img2	15
PD19	F320.04	img2	19
PD19	F320.04	img2	19
PD19	F320.04	img2	19
PD19	F320.04	img2	20
PD19	F320.04	img2	21
PD19	F320.04	img2	21
PD19	F320.04	img2	21
PD19	F320.04	img2	22
PD19	F320.04	img2	23
PD19	F320.04	img2	23
PD19	F320.04	img2	23
PD19	F320.04	img2	24
PD19	F320.04	img2	24
PD19	F320.04	img2	24
PD19	F320.04	img2	24
PD19	F320.04	img2	25
PD19	F320.04	img2	26
PD19	F320.04	img2	26
PD19	F320.04	img2	27
PD19	F320.04	img2	27
PD19	F320.04	img2	29
PD19	F320.04	img2	30
PD19	F320.04	img2	30
PD19	F320.04	img2	30
PD19	F320.04	img2	31
PD19	F320.04	img2	31
PD19	F320.04	img2	33
PD19	F320.04	img2	38
PD19	F320.04	img2	44
PD19	F320.04	img2	45
PD19	F320.04	img2	49
PD19	F320.04	img2	51
PD19	F320.04	img2	51
PD19	F320.04	img2	58
PD19	F320.04	img2	61
PD19	F320.04	img2	67
PD19	F320.04	img2	72
PD19	F320.04	img2	76
PD19	F320.04	img2	88
PD19	F320.04	img3	0
PD19	F320.04	img3	1
PD19	F320.04	img3	1
PD19	F320.04	img3	1
PD19	F320.04	img3	1
PD19	F320.04	img3	2
PD19	F320.04	img3	2
PD19	F320.04	img3	2
PD19	F320.04	img3	3
PD19	F320.04	img3	3
PD19	F320.04	img3	3
PD19	F320.04	img3	4
PD19	F320.04	img3	5
PD19	F320.04	img3	7
PD19	F320.04	img3	7
PD19	F320.04	img3	7
PD19	F320.04	img3	7
PD19	F320.04	img3	8
PD19	F320.04	img3	8
PD19	F320.04	img3	9
PD19	F320.04	img3	10
PD19	F320.04	img3	12
PD19	F320.04	img3	12
PD19	F320.04	img3	12
PD19	F320.04	img3	13
PD19	F320.04	img3	13
PD19	F320.04	img3	14
PD19	F320.04	img3	14
PD19	F320.04	img3	14
PD19	F320.04	img3	14
PD19	F320.04	img3	15
PD19	F320.04	img3	16
PD19	F320.04	img3	16
PD19	F320.04	img3	18
PD19	F320.04	img3	19
PD19	F320.04	img3	20
PD19	F320.04	img3	21
PD19	F320.04	img3	23
PD19	F320.04	img3	24
PD19	F320.04	img3	26
PD19	F320.04	img3	27
PD19	F320.04	img3	27
PD19	F320.04	img3	30
PD19	F320.04	img3	30
PD19	F320.04	img3	30
PD19	F320.04	img3	32
PD19	F320.04	img3	33
PD19	F320.04	img3	33
PD19	F320.04	img3	33
PD19	F320.04	img3	34
PD19	F320.04	img3	39
PD19	F320.04	img3	41
PD19	F320.04	img3	42
PD19	F320.04	img3	44
PD19	F320.04	img3	44
PD19	F320.04	img3	45
PD19	F320.04	img3	52
PD19	F320.04	img3	53
PD19	F320.04	img3	59
PD19	F320.04	img3	59
PD19	F320.04	img3	63
PD19	F320.04	img3	74
PD19	F320.04	img3	76
PD19	F320.04	img3	79
PD19	F320.04	img3	84
PD19	F320.04	img3	90
PD19	F320.04	img3	57
PD19	F320.04	img3	56
PD19	F320.04	img4	0
PD19	F320.04	img4	1
PD19	F320.04	img4	1
PD19	F320.04	img4	1
PD19	F320.04	img4	1
PD19	F320.04	img4	1
PD19	F320.04	img4	2
PD19	F320.04	img4	2
PD19	F320.04	img4	2
PD19	F320.04	img4	2
PD19	F320.04	img4	3
PD19	F320.04	img4	3
PD19	F320.04	img4	3
PD19	F320.04	img4	3
PD19	F320.04	img4	4
PD19	F320.04	img4	4
PD19	F320.04	img4	5
PD19	F320.04	img4	5
PD19	F320.04	img4	5
PD19	F320.04	img4	7
PD19	F320.04	img4	7
PD19	F320.04	img4	7
PD19	F320.04	img4	7
PD19	F320.04	img4	9
PD19	F320.04	img4	9
PD19	F320.04	img4	9
PD19	F320.04	img4	10
PD19	F320.04	img4	11
PD19	F320.04	img4	11
PD19	F320.04	img4	12
PD19	F320.04	img4	12
PD19	F320.04	img4	12
PD19	F320.04	img4	13
PD19	F320.04	img4	13
PD19	F320.04	img4	13
PD19	F320.04	img4	15
PD19	F320.04	img4	16
PD19	F320.04	img4	16
PD19	F320.04	img4	16
PD19	F320.04	img4	16
PD19	F320.04	img4	17
PD19	F320.04	img4	17
PD19	F320.04	img4	17
PD19	F320.04	img4	17
PD19	F320.04	img4	18
PD19	F320.04	img4	18
PD19	F320.04	img4	19
PD19	F320.04	img4	19
PD19	F320.04	img4	20
PD19	F320.04	img4	20
PD19	F320.04	img4	21
PD19	F320.04	img4	21
PD19	F320.04	img4	24
PD19	F320.04	img4	25
PD19	F320.04	img4	27
PD19	F320.04	img4	28
PD19	F320.04	img4	29
PD19	F320.04	img4	29
PD19	F320.04	img4	30
PD19	F320.04	img4	32
PD19	F320.04	img4	33
PD19	F320.04	img4	34
PD19	F320.04	img4	35
PD19	F320.04	img4	36
PD19	F320.04	img4	39
PD19	F320.04	img4	42
PD19	F320.04	img4	43
PD19	F320.04	img4	47
PD19	F320.04	img4	56
PD19	F320.04	img4	66
PD19	F320.04	img4	68
PD19	F320.04	img4	69
PD19	F320.04	img4	72
PD19	F320.04	img4	73
PD19	F320.04	img4	76
PD19	F320.04	img4	81
PD19	F320.04	img4	84
PD19	F320.04	img4	89
PD19	F320.04	img4	89
PD19	F320.04	img5	0
PD19	F320.04	img5	0
PD19	F320.04	img5	0
PD19	F320.04	img5	1
PD19	F320.04	img5	1
PD19	F320.04	img5	2
PD19	F320.04	img5	2
PD19	F320.04	img5	2
PD19	F320.04	img5	3
PD19	F320.04	img5	3
PD19	F320.04	img5	4
PD19	F320.04	img5	5
PD19	F320.04	img5	5
PD19	F320.04	img5	5
PD19	F320.04	img5	5
PD19	F320.04	img5	6
PD19	F320.04	img5	6
PD19	F320.04	img5	7
PD19	F320.04	img5	7
PD19	F320.04	img5	7
PD19	F320.04	img5	8
PD19	F320.04	img5	8
PD19	F320.04	img5	8
PD19	F320.04	img5	9
PD19	F320.04	img5	9
PD19	F320.04	img5	9
PD19	F320.04	img5	9
PD19	F320.04	img5	10
PD19	F320.04	img5	10
PD19	F320.04	img5	11
PD19	F320.04	img5	11
PD19	F320.04	img5	12
PD19	F320.04	img5	12
PD19	F320.04	img5	14
PD19	F320.04	img5	14
PD19	F320.04	img5	15
PD19	F320.04	img5	15
PD19	F320.04	img5	17
PD19	F320.04	img5	20
PD19	F320.04	img5	22
PD19	F320.04	img5	23
PD19	F320.04	img5	24
PD19	F320.04	img5	24
PD19	F320.04	img5	30
PD19	F320.04	img5	32
PD19	F320.04	img5	34
PD19	F320.04	img5	35
PD19	F320.04	img5	35
PD19	F320.04	img5	39
PD19	F320.04	img5	41
PD19	F320.04	img5	44
PD19	F320.04	img5	52
PD19	F320.04	img5	56
PD19	F320.04	img5	56
PD19	F320.04	img5	57
PD19	F320.04	img5	65
PD19	F320.04	img5	90
PD19	F320.06	img1	0
PD19	F320.06	img1	0
PD19	F320.06	img1	0
PD19	F320.06	img1	0
PD19	F320.06	img1	1
PD19	F320.06	img1	1
PD19	F320.06	img1	1
PD19	F320.06	img1	1
PD19	F320.06	img1	2
PD19	F320.06	img1	2
PD19	F320.06	img1	2
PD19	F320.06	img1	3
PD19	F320.06	img1	3
PD19	F320.06	img1	3
PD19	F320.06	img1	4
PD19	F320.06	img1	6
PD19	F320.06	img1	6
PD19	F320.06	img1	6
PD19	F320.06	img1	6
PD19	F320.06	img1	7
PD19	F320.06	img1	8
PD19	F320.06	img1	8
PD19	F320.06	img1	8
PD19	F320.06	img1	9
PD19	F320.06	img1	11
PD19	F320.06	img1	12
PD19	F320.06	img1	12
PD19	F320.06	img1	13
PD19	F320.06	img1	13
PD19	F320.06	img1	13
PD19	F320.06	img1	14
PD19	F320.06	img1	15
PD19	F320.06	img1	17
PD19	F320.06	img1	17
PD19	F320.06	img1	18
PD19	F320.06	img1	18
PD19	F320.06	img1	20
PD19	F320.06	img1	23
PD19	F320.06	img1	23
PD19	F320.06	img1	24
PD19	F320.06	img1	25
PD19	F320.06	img1	25
PD19	F320.06	img1	25
PD19	F320.06	img1	28
PD19	F320.06	img1	33
PD19	F320.06	img1	38
PD19	F320.06	img1	38
PD19	F320.06	img1	39
PD19	F320.06	img1	40
PD19	F320.06	img1	41
PD19	F320.06	img1	47
PD19	F320.06	img1	58
PD19	F320.06	img1	62
PD19	F320.06	img1	67
PD19	F320.06	img2	0
PD19	F320.06	img2	0
PD19	F320.06	img2	0
PD19	F320.06	img2	1
PD19	F320.06	img2	1
PD19	F320.06	img2	1
PD19	F320.06	img2	1
PD19	F320.06	img2	2
PD19	F320.06	img2	3
PD19	F320.06	img2	3
PD19	F320.06	img2	3
PD19	F320.06	img2	4
PD19	F320.06	img2	4
PD19	F320.06	img2	4
PD19	F320.06	img2	5
PD19	F320.06	img2	5
PD19	F320.06	img2	6
PD19	F320.06	img2	6
PD19	F320.06	img2	8
PD19	F320.06	img2	9
PD19	F320.06	img2	9
PD19	F320.06	img2	10
PD19	F320.06	img2	11
PD19	F320.06	img2	12
PD19	F320.06	img2	13
PD19	F320.06	img2	13
PD19	F320.06	img2	14
PD19	F320.06	img2	14
PD19	F320.06	img2	15
PD19	F320.06	img2	15
PD19	F320.06	img2	15
PD19	F320.06	img2	16
PD19	F320.06	img2	16
PD19	F320.06	img2	18
PD19	F320.06	img2	19
PD19	F320.06	img2	20
PD19	F320.06	img2	20
PD19	F320.06	img2	21
PD19	F320.06	img2	21
PD19	F320.06	img2	22
PD19	F320.06	img2	23
PD19	F320.06	img2	23
PD19	F320.06	img2	23
PD19	F320.06	img2	24
PD19	F320.06	img2	25
PD19	F320.06	img2	26
PD19	F320.06	img2	26
PD19	F320.06	img2	27
PD19	F320.06	img2	27
PD19	F320.06	img2	28
PD19	F320.06	img2	28
PD19	F320.06	img2	29
PD19	F320.06	img2	31
PD19	F320.06	img2	33
PD19	F320.06	img2	34
PD19	F320.06	img2	36
PD19	F320.06	img2	48
PD19	F320.06	img2	53
PD19	F320.06	img2	60
PD19	F320.06	img2	61
PD19	F320.06	img2	80
PD19	F320.06	img2	80
PD19	F320.06	img2	80
PD19	F320.06	img3	0
PD19	F320.06	img3	0
PD19	F320.06	img3	0
PD19	F320.06	img3	0
PD19	F320.06	img3	0
PD19	F320.06	img3	1
PD19	F320.06	img3	1
PD19	F320.06	img3	1
PD19	F320.06	img3	2
PD19	F320.06	img3	2
PD19	F320.06	img3	2
PD19	F320.06	img3	3
PD19	F320.06	img3	5
PD19	F320.06	img3	6
PD19	F320.06	img3	6
PD19	F320.06	img3	6
PD19	F320.06	img3	7
PD19	F320.06	img3	7
PD19	F320.06	img3	8
PD19	F320.06	img3	9
PD19	F320.06	img3	10
PD19	F320.06	img3	11
PD19	F320.06	img3	11
PD19	F320.06	img3	11
PD19	F320.06	img3	11
PD19	F320.06	img3	12
PD19	F320.06	img3	13
PD19	F320.06	img3	13
PD19	F320.06	img3	13
PD19	F320.06	img3	13
PD19	F320.06	img3	14
PD19	F320.06	img3	14
PD19	F320.06	img3	15
PD19	F320.06	img3	15
PD19	F320.06	img3	16
PD19	F320.06	img3	16
PD19	F320.06	img3	16
PD19	F320.06	img3	16
PD19	F320.06	img3	16
PD19	F320.06	img3	16
PD19	F320.06	img3	17
PD19	F320.06	img3	18
PD19	F320.06	img3	20
PD19	F320.06	img3	21
PD19	F320.06	img3	22
PD19	F320.06	img3	22
PD19	F320.06	img3	23
PD19	F320.06	img3	23
PD19	F320.06	img3	23
PD19	F320.06	img3	23
PD19	F320.06	img3	23
PD19	F320.06	img3	24
PD19	F320.06	img3	24
PD19	F320.06	img3	26
PD19	F320.06	img3	28
PD19	F320.06	img3	29
PD19	F320.06	img3	29
PD19	F320.06	img3	31
PD19	F320.06	img3	33
PD19	F320.06	img3	44
PD19	F320.06	img3	66
PD19	F320.06	img4	1
PD19	F320.06	img4	1
PD19	F320.06	img4	2
PD19	F320.06	img4	2
PD19	F320.06	img4	4
PD19	F320.06	img4	5
PD19	F320.06	img4	5
PD19	F320.06	img4	5
PD19	F320.06	img4	6
PD19	F320.06	img4	6
PD19	F320.06	img4	6
PD19	F320.06	img4	6
PD19	F320.06	img4	7
PD19	F320.06	img4	7
PD19	F320.06	img4	7
PD19	F320.06	img4	8
PD19	F320.06	img4	8
PD19	F320.06	img4	8
PD19	F320.06	img4	9
PD19	F320.06	img4	9
PD19	F320.06	img4	9
PD19	F320.06	img4	9
PD19	F320.06	img4	9
PD19	F320.06	img4	10
PD19	F320.06	img4	10
PD19	F320.06	img4	10
PD19	F320.06	img4	10
PD19	F320.06	img4	10
PD19	F320.06	img4	11
PD19	F320.06	img4	12
PD19	F320.06	img4	13
PD19	F320.06	img4	13
PD19	F320.06	img4	13
PD19	F320.06	img4	14
PD19	F320.06	img4	16
PD19	F320.06	img4	17
PD19	F320.06	img4	19
PD19	F320.06	img4	20
PD19	F320.06	img4	21
PD19	F320.06	img4	21
PD19	F320.06	img4	25
PD19	F320.06	img4	25
PD19	F320.06	img4	25
PD19	F320.06	img4	25
PD19	F320.06	img4	29
PD19	F320.06	img4	29
PD19	F320.06	img4	32
PD19	F320.06	img4	32
PD19	F320.06	img4	33
PD19	F320.06	img4	33
PD19	F320.06	img4	36
PD19	F320.06	img4	37
PD19	F320.06	img4	44
PD19	F320.06	img4	48
PD19	F320.06	img4	50
PD19	F320.06	img4	52
PD19	F320.06	img4	55
PD19	F320.06	img4	56
PD19	F320.06	img4	56
PD19	F320.06	img4	62
PD19	F320.06	img4	63
PD19	F320.06	img4	69
PD19	F320.06	img4	72
PD19	F320.06	img4	84
PD19	F320.06	img4	90
PD19	F320.06	img5	0
PD19	F320.06	img5	0
PD19	F320.06	img5	1
PD19	F320.06	img5	1
PD19	F320.06	img5	1
PD19	F320.06	img5	1
PD19	F320.06	img5	2
PD19	F320.06	img5	2
PD19	F320.06	img5	2
PD19	F320.06	img5	3
PD19	F320.06	img5	4
PD19	F320.06	img5	4
PD19	F320.06	img5	5
PD19	F320.06	img5	5
PD19	F320.06	img5	6
PD19	F320.06	img5	6
PD19	F320.06	img5	6
PD19	F320.06	img5	7
PD19	F320.06	img5	7
PD19	F320.06	img5	9
PD19	F320.06	img5	9
PD19	F320.06	img5	9
PD19	F320.06	img5	10
PD19	F320.06	img5	10
PD19	F320.06	img5	11
PD19	F320.06	img5	12
PD19	F320.06	img5	12
PD19	F320.06	img5	12
PD19	F320.06	img5	12
PD19	F320.06	img5	13
PD19	F320.06	img5	14
PD19	F320.06	img5	14
PD19	F320.06	img5	14
PD19	F320.06	img5	15
PD19	F320.06	img5	15
PD19	F320.06	img5	16
PD19	F320.06	img5	17
PD19	F320.06	img5	18
PD19	F320.06	img5	18
PD19	F320.06	img5	19
PD19	F320.06	img5	19
PD19	F320.06	img5	19
PD19	F320.06	img5	20
PD19	F320.06	img5	20
PD19	F320.06	img5	21
PD19	F320.06	img5	23
PD19	F320.06	img5	25
PD19	F320.06	img5	27
PD19	F320.06	img5	29
PD19	F320.06	img5	29
PD19	F320.06	img5	31
PD19	F320.06	img5	32
PD19	F320.06	img5	35
PD19	F320.06	img5	35
PD19	F320.06	img5	43
PD19	F320.06	img5	49
PD19	F320.06	img5	49
PD19	F320.06	img5	49
PD19	F320.06	img5	50
PD19	F320.06	img5	53
PD19	F320.06	img5	55
PD19	F320.06	img5	59
PD19	F320.06	img5	62
PD19	F320.06	img5	65
PD19	F320.06	img5	66
PD19	F320.06	img5	70
PD19	F320.06	img5	85
PD20	F284.03	img1	0
PD20	F284.03	img1	0
PD20	F284.03	img1	0
PD20	F284.03	img1	0
PD20	F284.03	img1	1
PD20	F284.03	img1	1
PD20	F284.03	img1	1
PD20	F284.03	img1	1
PD20	F284.03	img1	1
PD20	F284.03	img1	1
PD20	F284.03	img1	2
PD20	F284.03	img1	2
PD20	F284.03	img1	2
PD20	F284.03	img1	2
PD20	F284.03	img1	3
PD20	F284.03	img1	3
PD20	F284.03	img1	4
PD20	F284.03	img1	4
PD20	F284.03	img1	5
PD20	F284.03	img1	5
PD20	F284.03	img1	5
PD20	F284.03	img1	5
PD20	F284.03	img1	5
PD20	F284.03	img1	7
PD20	F284.03	img1	7
PD20	F284.03	img1	8
PD20	F284.03	img1	9
PD20	F284.03	img1	9
PD20	F284.03	img1	10
PD20	F284.03	img1	11
PD20	F284.03	img1	12
PD20	F284.03	img1	18
PD20	F284.03	img1	19
PD20	F284.03	img1	19
PD20	F284.03	img1	19
PD20	F284.03	img1	25
PD20	F284.03	img1	26
PD20	F284.03	img1	27
PD20	F284.03	img1	30
PD20	F284.03	img1	33
PD20	F284.03	img1	34
PD20	F284.03	img1	36
PD20	F284.03	img1	46
PD20	F284.03	img1	48
PD20	F284.03	img1	60
PD20	F284.03	img2	0
PD20	F284.03	img2	0
PD20	F284.03	img2	0
PD20	F284.03	img2	0
PD20	F284.03	img2	0
PD20	F284.03	img2	0
PD20	F284.03	img2	0
PD20	F284.03	img2	0
PD20	F284.03	img2	1
PD20	F284.03	img2	1
PD20	F284.03	img2	1
PD20	F284.03	img2	2
PD20	F284.03	img2	2
PD20	F284.03	img2	2
PD20	F284.03	img2	2
PD20	F284.03	img2	3
PD20	F284.03	img2	3
PD20	F284.03	img2	3
PD20	F284.03	img2	3
PD20	F284.03	img2	3
PD20	F284.03	img2	3
PD20	F284.03	img2	3
PD20	F284.03	img2	5
PD20	F284.03	img2	6
PD20	F284.03	img2	6
PD20	F284.03	img2	7
PD20	F284.03	img2	7
PD20	F284.03	img2	8
PD20	F284.03	img2	10
PD20	F284.03	img2	10
PD20	F284.03	img2	11
PD20	F284.03	img2	12
PD20	F284.03	img2	12
PD20	F284.03	img2	14
PD20	F284.03	img2	14
PD20	F284.03	img2	15
PD20	F284.03	img2	16
PD20	F284.03	img2	17
PD20	F284.03	img2	17
PD20	F284.03	img2	18
PD20	F284.03	img2	19
PD20	F284.03	img2	19
PD20	F284.03	img2	21
PD20	F284.03	img2	23
PD20	F284.03	img2	25
PD20	F284.03	img2	27
PD20	F284.03	img2	39
PD20	F284.03	img2	49
PD20	F284.03	img2	51
PD20	F284.03	img2	58
PD20	F284.03	img2	62
PD20	F284.03	img2	69
PD20	F284.03	img2	87
PD20	F284.03	img3	0
PD20	F284.03	img3	0
PD20	F284.03	img3	0
PD20	F284.03	img3	0
PD20	F284.03	img3	0
PD20	F284.03	img3	0
PD20	F284.03	img3	1
PD20	F284.03	img3	1
PD20	F284.03	img3	1
PD20	F284.03	img3	2
PD20	F284.03	img3	2
PD20	F284.03	img3	2
PD20	F284.03	img3	2
PD20	F284.03	img3	2
PD20	F284.03	img3	3
PD20	F284.03	img3	4
PD20	F284.03	img3	4
PD20	F284.03	img3	5
PD20	F284.03	img3	6
PD20	F284.03	img3	7
PD20	F284.03	img3	7
PD20	F284.03	img3	7
PD20	F284.03	img3	7
PD20	F284.03	img3	8
PD20	F284.03	img3	11
PD20	F284.03	img3	14
PD20	F284.03	img3	15
PD20	F284.03	img3	15
PD20	F284.03	img3	15
PD20	F284.03	img3	16
PD20	F284.03	img3	18
PD20	F284.03	img3	22
PD20	F284.03	img3	24
PD20	F284.03	img3	25
PD20	F284.03	img3	25
PD20	F284.03	img3	27
PD20	F284.03	img3	31
PD20	F284.03	img3	38
PD20	F284.03	img3	51
PD20	F284.03	img3	52
PD20	F284.03	img3	56
PD20	F284.03	img3	73
PD20	F284.03	img4	0
PD20	F284.03	img4	0
PD20	F284.03	img4	0
PD20	F284.03	img4	0
PD20	F284.03	img4	0
PD20	F284.03	img4	1
PD20	F284.03	img4	1
PD20	F284.03	img4	1
PD20	F284.03	img4	1
PD20	F284.03	img4	1
PD20	F284.03	img4	1
PD20	F284.03	img4	1
PD20	F284.03	img4	1
PD20	F284.03	img4	2
PD20	F284.03	img4	2
PD20	F284.03	img4	2
PD20	F284.03	img4	2
PD20	F284.03	img4	3
PD20	F284.03	img4	3
PD20	F284.03	img4	3
PD20	F284.03	img4	3
PD20	F284.03	img4	3
PD20	F284.03	img4	3
PD20	F284.03	img4	3
PD20	F284.03	img4	4
PD20	F284.03	img4	4
PD20	F284.03	img4	4
PD20	F284.03	img4	4
PD20	F284.03	img4	4
PD20	F284.03	img4	4
PD20	F284.03	img4	5
PD20	F284.03	img4	5
PD20	F284.03	img4	5
PD20	F284.03	img4	6
PD20	F284.03	img4	6
PD20	F284.03	img4	7
PD20	F284.03	img4	7
PD20	F284.03	img4	9
PD20	F284.03	img4	9
PD20	F284.03	img4	10
PD20	F284.03	img4	10
PD20	F284.03	img4	11
PD20	F284.03	img4	16
PD20	F284.03	img4	16
PD20	F284.03	img4	17
PD20	F284.03	img4	18
PD20	F284.03	img4	19
PD20	F284.03	img4	24
PD20	F284.03	img4	25
PD20	F284.03	img4	28
PD20	F284.03	img4	28
PD20	F284.03	img4	30
PD20	F284.03	img4	36
PD20	F284.03	img4	44
PD20	F284.03	img4	44
PD20	F284.03	img4	52
PD20	F284.03	img5	0
PD20	F284.03	img5	0
PD20	F284.03	img5	0
PD20	F284.03	img5	0
PD20	F284.03	img5	0
PD20	F284.03	img5	1
PD20	F284.03	img5	1
PD20	F284.03	img5	1
PD20	F284.03	img5	1
PD20	F284.03	img5	1
PD20	F284.03	img5	2
PD20	F284.03	img5	2
PD20	F284.03	img5	2
PD20	F284.03	img5	2
PD20	F284.03	img5	2
PD20	F284.03	img5	2
PD20	F284.03	img5	2
PD20	F284.03	img5	2
PD20	F284.03	img5	3
PD20	F284.03	img5	3
PD20	F284.03	img5	3
PD20	F284.03	img5	3
PD20	F284.03	img5	3
PD20	F284.03	img5	3
PD20	F284.03	img5	3
PD20	F284.03	img5	4
PD20	F284.03	img5	4
PD20	F284.03	img5	4
PD20	F284.03	img5	4
PD20	F284.03	img5	4
PD20	F284.03	img5	4
PD20	F284.03	img5	5
PD20	F284.03	img5	5
PD20	F284.03	img5	6
PD20	F284.03	img5	6
PD20	F284.03	img5	6
PD20	F284.03	img5	7
PD20	F284.03	img5	8
PD20	F284.03	img5	8
PD20	F284.03	img5	9
PD20	F284.03	img5	10
PD20	F284.03	img5	10
PD20	F284.03	img5	11
PD20	F284.03	img5	12
PD20	F284.03	img5	13
PD20	F284.03	img5	14
PD20	F284.03	img5	14
PD20	F284.03	img5	14
PD20	F284.03	img5	14
PD20	F284.03	img5	17
PD20	F284.03	img5	18
PD20	F284.03	img5	19
PD20	F284.03	img5	19
PD20	F284.03	img5	21
PD20	F284.03	img5	21
PD20	F284.03	img5	24
PD20	F284.03	img5	27
PD20	F284.03	img5	29
PD20	F284.03	img5	30
PD20	F284.03	img5	36
PD20	F284.03	img5	38
PD20	F284.03	img5	39
PD20	F284.03	img5	40
PD20	F284.03	img5	44
PD20	F284.03	img5	73
PD20	F284.04	img1	0
PD20	F284.04	img1	0
PD20	F284.04	img1	0
PD20	F284.04	img1	1
PD20	F284.04	img1	1
PD20	F284.04	img1	1
PD20	F284.04	img1	1
PD20	F284.04	img1	2
PD20	F284.04	img1	2
PD20	F284.04	img1	2
PD20	F284.04	img1	3
PD20	F284.04	img1	3
PD20	F284.04	img1	3
PD20	F284.04	img1	3
PD20	F284.04	img1	4
PD20	F284.04	img1	4
PD20	F284.04	img1	4
PD20	F284.04	img1	4
PD20	F284.04	img1	4
PD20	F284.04	img1	4
PD20	F284.04	img1	5
PD20	F284.04	img1	5
PD20	F284.04	img1	5
PD20	F284.04	img1	5
PD20	F284.04	img1	6
PD20	F284.04	img1	6
PD20	F284.04	img1	6
PD20	F284.04	img1	6
PD20	F284.04	img1	7
PD20	F284.04	img1	7
PD20	F284.04	img1	7
PD20	F284.04	img1	7
PD20	F284.04	img1	7
PD20	F284.04	img1	8
PD20	F284.04	img1	8
PD20	F284.04	img1	8
PD20	F284.04	img1	8
PD20	F284.04	img1	9
PD20	F284.04	img1	9
PD20	F284.04	img1	9
PD20	F284.04	img1	10
PD20	F284.04	img1	10
PD20	F284.04	img1	10
PD20	F284.04	img1	11
PD20	F284.04	img1	11
PD20	F284.04	img1	11
PD20	F284.04	img1	11
PD20	F284.04	img1	12
PD20	F284.04	img1	13
PD20	F284.04	img1	13
PD20	F284.04	img1	14
PD20	F284.04	img1	15
PD20	F284.04	img1	15
PD20	F284.04	img1	16
PD20	F284.04	img1	16
PD20	F284.04	img1	17
PD20	F284.04	img1	17
PD20	F284.04	img1	20
PD20	F284.04	img1	20
PD20	F284.04	img1	21
PD20	F284.04	img1	22
PD20	F284.04	img1	23
PD20	F284.04	img1	27
PD20	F284.04	img1	28
PD20	F284.04	img1	30
PD20	F284.04	img1	32
PD20	F284.04	img1	32
PD20	F284.04	img1	35
PD20	F284.04	img1	36
PD20	F284.04	img1	37
PD20	F284.04	img1	50
PD20	F284.04	img1	32
PD20	F284.04	img2	0
PD20	F284.04	img2	0
PD20	F284.04	img2	0
PD20	F284.04	img2	0
PD20	F284.04	img2	0
PD20	F284.04	img2	0
PD20	F284.04	img2	0
PD20	F284.04	img2	0
PD20	F284.04	img2	1
PD20	F284.04	img2	1
PD20	F284.04	img2	1
PD20	F284.04	img2	1
PD20	F284.04	img2	1
PD20	F284.04	img2	1
PD20	F284.04	img2	1
PD20	F284.04	img2	2
PD20	F284.04	img2	2
PD20	F284.04	img2	2
PD20	F284.04	img2	2
PD20	F284.04	img2	2
PD20	F284.04	img2	2
PD20	F284.04	img2	2
PD20	F284.04	img2	2
PD20	F284.04	img2	3
PD20	F284.04	img2	3
PD20	F284.04	img2	3
PD20	F284.04	img2	3
PD20	F284.04	img2	3
PD20	F284.04	img2	3
PD20	F284.04	img2	4
PD20	F284.04	img2	4
PD20	F284.04	img2	4
PD20	F284.04	img2	5
PD20	F284.04	img2	5
PD20	F284.04	img2	5
PD20	F284.04	img2	5
PD20	F284.04	img2	5
PD20	F284.04	img2	5
PD20	F284.04	img2	6
PD20	F284.04	img2	6
PD20	F284.04	img2	6
PD20	F284.04	img2	6
PD20	F284.04	img2	7
PD20	F284.04	img2	7
PD20	F284.04	img2	7
PD20	F284.04	img2	7
PD20	F284.04	img2	8
PD20	F284.04	img2	9
PD20	F284.04	img2	9
PD20	F284.04	img2	10
PD20	F284.04	img2	10
PD20	F284.04	img2	11
PD20	F284.04	img2	12
PD20	F284.04	img2	14
PD20	F284.04	img2	16
PD20	F284.04	img2	17
PD20	F284.04	img2	17
PD20	F284.04	img2	18
PD20	F284.04	img2	18
PD20	F284.04	img2	20
PD20	F284.04	img2	23
PD20	F284.04	img2	23
PD20	F284.04	img2	23
PD20	F284.04	img2	27
PD20	F284.04	img2	27
PD20	F284.04	img2	30
PD20	F284.04	img2	34
PD20	F284.04	img2	38
PD20	F284.04	img2	40
PD20	F284.04	img2	59
PD20	F284.04	img2	75
PD20	F284.04	img2	77
PD20	F284.04	img2	26
PD20	F284.04	img3	0
PD20	F284.04	img3	0
PD20	F284.04	img3	0
PD20	F284.04	img3	0
PD20	F284.04	img3	0
PD20	F284.04	img3	0
PD20	F284.04	img3	0
PD20	F284.04	img3	0
PD20	F284.04	img3	0
PD20	F284.04	img3	0
PD20	F284.04	img3	0
PD20	F284.04	img3	1
PD20	F284.04	img3	1
PD20	F284.04	img3	1
PD20	F284.04	img3	1
PD20	F284.04	img3	1
PD20	F284.04	img3	1
PD20	F284.04	img3	1
PD20	F284.04	img3	2
PD20	F284.04	img3	3
PD20	F284.04	img3	3
PD20	F284.04	img3	3
PD20	F284.04	img3	3
PD20	F284.04	img3	4
PD20	F284.04	img3	4
PD20	F284.04	img3	4
PD20	F284.04	img3	4
PD20	F284.04	img3	5
PD20	F284.04	img3	5
PD20	F284.04	img3	5
PD20	F284.04	img3	5
PD20	F284.04	img3	5
PD20	F284.04	img3	5
PD20	F284.04	img3	6
PD20	F284.04	img3	7
PD20	F284.04	img3	7
PD20	F284.04	img3	8
PD20	F284.04	img3	8
PD20	F284.04	img3	9
PD20	F284.04	img3	9
PD20	F284.04	img3	10
PD20	F284.04	img3	11
PD20	F284.04	img3	12
PD20	F284.04	img3	12
PD20	F284.04	img3	12
PD20	F284.04	img3	12
PD20	F284.04	img3	13
PD20	F284.04	img3	14
PD20	F284.04	img3	15
PD20	F284.04	img3	15
PD20	F284.04	img3	18
PD20	F284.04	img3	19
PD20	F284.04	img3	20
PD20	F284.04	img3	21
PD20	F284.04	img3	22
PD20	F284.04	img3	23
PD20	F284.04	img3	24
PD20	F284.04	img3	24
PD20	F284.04	img3	25
PD20	F284.04	img3	26
PD20	F284.04	img3	27
PD20	F284.04	img3	27
PD20	F284.04	img3	28
PD20	F284.04	img3	30
PD20	F284.04	img3	30
PD20	F284.04	img3	34
PD20	F284.04	img3	35
PD20	F284.04	img3	39
PD20	F284.04	img3	41
PD20	F284.04	img3	47
PD20	F284.04	img3	54
PD20	F284.04	img3	56
PD20	F284.04	img3	81
PD20	F284.04	img3	59
PD20	F284.04	img4	0
PD20	F284.04	img4	1
PD20	F284.04	img4	1
PD20	F284.04	img4	1
PD20	F284.04	img4	1
PD20	F284.04	img4	1
PD20	F284.04	img4	1
PD20	F284.04	img4	1
PD20	F284.04	img4	1
PD20	F284.04	img4	2
PD20	F284.04	img4	2
PD20	F284.04	img4	2
PD20	F284.04	img4	2
PD20	F284.04	img4	3
PD20	F284.04	img4	3
PD20	F284.04	img4	3
PD20	F284.04	img4	3
PD20	F284.04	img4	4
PD20	F284.04	img4	4
PD20	F284.04	img4	4
PD20	F284.04	img4	4
PD20	F284.04	img4	4
PD20	F284.04	img4	5
PD20	F284.04	img4	5
PD20	F284.04	img4	5
PD20	F284.04	img4	5
PD20	F284.04	img4	6
PD20	F284.04	img4	6
PD20	F284.04	img4	6
PD20	F284.04	img4	8
PD20	F284.04	img4	9
PD20	F284.04	img4	9
PD20	F284.04	img4	9
PD20	F284.04	img4	9
PD20	F284.04	img4	9
PD20	F284.04	img4	10
PD20	F284.04	img4	11
PD20	F284.04	img4	11
PD20	F284.04	img4	11
PD20	F284.04	img4	12
PD20	F284.04	img4	12
PD20	F284.04	img4	12
PD20	F284.04	img4	12
PD20	F284.04	img4	13
PD20	F284.04	img4	13
PD20	F284.04	img4	14
PD20	F284.04	img4	15
PD20	F284.04	img4	15
PD20	F284.04	img4	15
PD20	F284.04	img4	18
PD20	F284.04	img4	18
PD20	F284.04	img4	18
PD20	F284.04	img4	19
PD20	F284.04	img4	22
PD20	F284.04	img4	23
PD20	F284.04	img4	24
PD20	F284.04	img4	32
PD20	F284.04	img4	48
PD20	F284.04	img4	67
PD20	F284.04	img4	85
PD20	F284.04	img4	63
PD20	F284.04	img5	0
PD20	F284.04	img5	0
PD20	F284.04	img5	0
PD20	F284.04	img5	0
PD20	F284.04	img5	0
PD20	F284.04	img5	0
PD20	F284.04	img5	0
PD20	F284.04	img5	0
PD20	F284.04	img5	0
PD20	F284.04	img5	0
PD20	F284.04	img5	0
PD20	F284.04	img5	0
PD20	F284.04	img5	1
PD20	F284.04	img5	1
PD20	F284.04	img5	1
PD20	F284.04	img5	1
PD20	F284.04	img5	1
PD20	F284.04	img5	1
PD20	F284.04	img5	1
PD20	F284.04	img5	1
PD20	F284.04	img5	1
PD20	F284.04	img5	1
PD20	F284.04	img5	2
PD20	F284.04	img5	2
PD20	F284.04	img5	3
PD20	F284.04	img5	3
PD20	F284.04	img5	3
PD20	F284.04	img5	3
PD20	F284.04	img5	3
PD20	F284.04	img5	5
PD20	F284.04	img5	5
PD20	F284.04	img5	5
PD20	F284.04	img5	5
PD20	F284.04	img5	6
PD20	F284.04	img5	6
PD20	F284.04	img5	6
PD20	F284.04	img5	6
PD20	F284.04	img5	7
PD20	F284.04	img5	7
PD20	F284.04	img5	8
PD20	F284.04	img5	8
PD20	F284.04	img5	9
PD20	F284.04	img5	9
PD20	F284.04	img5	9
PD20	F284.04	img5	9
PD20	F284.04	img5	9
PD20	F284.04	img5	9
PD20	F284.04	img5	9
PD20	F284.04	img5	10
PD20	F284.04	img5	10
PD20	F284.04	img5	11
PD20	F284.04	img5	11
PD20	F284.04	img5	11
PD20	F284.04	img5	11
PD20	F284.04	img5	11
PD20	F284.04	img5	12
PD20	F284.04	img5	13
PD20	F284.04	img5	13
PD20	F284.04	img5	14
PD20	F284.04	img5	15
PD20	F284.04	img5	15
PD20	F284.04	img5	15
PD20	F284.04	img5	15
PD20	F284.04	img5	16
PD20	F284.04	img5	17
PD20	F284.04	img5	17
PD20	F284.04	img5	18
PD20	F284.04	img5	19
PD20	F284.04	img5	19
PD20	F284.04	img5	20
PD20	F284.04	img5	20
PD20	F284.04	img5	20
PD20	F284.04	img5	20
PD20	F284.04	img5	21
PD20	F284.04	img5	22
PD20	F284.04	img5	23
PD20	F284.04	img5	27
PD20	F284.04	img5	27
PD20	F284.04	img5	29
PD20	F284.04	img5	32
PD20	F284.04	img5	33
PD20	F284.04	img5	33
PD20	F284.04	img5	35
PD20	F284.04	img5	41
PD20	F284.04	img5	50
PD20	F284.04	img5	55
PD20	F284.04	img5	76
PD20	F284.04	img5	81
PD20	F284.04	img5	55
PD20	F284.04	img5	41
PD20	F284.04	img5	33
PD20	F284.04	img5	14
PD20	F320.09	img1	0
PD20	F320.09	img1	0
PD20	F320.09	img1	0
PD20	F320.09	img1	0
PD20	F320.09	img1	0
PD20	F320.09	img1	0
PD20	F320.09	img1	1
PD20	F320.09	img1	1
PD20	F320.09	img1	1
PD20	F320.09	img1	2
PD20	F320.09	img1	2
PD20	F320.09	img1	2
PD20	F320.09	img1	3
PD20	F320.09	img1	3
PD20	F320.09	img1	3
PD20	F320.09	img1	3
PD20	F320.09	img1	3
PD20	F320.09	img1	4
PD20	F320.09	img1	4
PD20	F320.09	img1	4
PD20	F320.09	img1	4
PD20	F320.09	img1	6
PD20	F320.09	img1	9
PD20	F320.09	img1	10
PD20	F320.09	img1	13
PD20	F320.09	img1	15
PD20	F320.09	img1	17
PD20	F320.09	img1	18
PD20	F320.09	img1	18
PD20	F320.09	img1	18
PD20	F320.09	img1	21
PD20	F320.09	img1	21
PD20	F320.09	img1	22
PD20	F320.09	img1	23
PD20	F320.09	img1	25
PD20	F320.09	img1	25
PD20	F320.09	img1	25
PD20	F320.09	img1	28
PD20	F320.09	img1	29
PD20	F320.09	img1	29
PD20	F320.09	img1	33
PD20	F320.09	img1	34
PD20	F320.09	img1	36
PD20	F320.09	img1	37
PD20	F320.09	img1	38
PD20	F320.09	img1	39
PD20	F320.09	img1	41
PD20	F320.09	img1	44
PD20	F320.09	img1	46
PD20	F320.09	img1	48
PD20	F320.09	img1	50
PD20	F320.09	img1	50
PD20	F320.09	img1	55
PD20	F320.09	img1	55
PD20	F320.09	img1	71
PD20	F320.09	img1	82
PD20	F320.09	img1	84
PD20	F320.09	img2	0
PD20	F320.09	img2	0
PD20	F320.09	img2	0
PD20	F320.09	img2	0
PD20	F320.09	img2	0
PD20	F320.09	img2	0
PD20	F320.09	img2	0
PD20	F320.09	img2	0
PD20	F320.09	img2	0
PD20	F320.09	img2	0
PD20	F320.09	img2	1
PD20	F320.09	img2	1
PD20	F320.09	img2	1
PD20	F320.09	img2	1
PD20	F320.09	img2	1
PD20	F320.09	img2	1
PD20	F320.09	img2	1
PD20	F320.09	img2	1
PD20	F320.09	img2	1
PD20	F320.09	img2	1
PD20	F320.09	img2	1
PD20	F320.09	img2	1
PD20	F320.09	img2	1
PD20	F320.09	img2	2
PD20	F320.09	img2	2
PD20	F320.09	img2	2
PD20	F320.09	img2	2
PD20	F320.09	img2	2
PD20	F320.09	img2	2
PD20	F320.09	img2	2
PD20	F320.09	img2	2
PD20	F320.09	img2	3
PD20	F320.09	img2	3
PD20	F320.09	img2	3
PD20	F320.09	img2	4
PD20	F320.09	img2	4
PD20	F320.09	img2	4
PD20	F320.09	img2	4
PD20	F320.09	img2	4
PD20	F320.09	img2	5
PD20	F320.09	img2	5
PD20	F320.09	img2	5
PD20	F320.09	img2	5
PD20	F320.09	img2	6
PD20	F320.09	img2	6
PD20	F320.09	img2	6
PD20	F320.09	img2	7
PD20	F320.09	img2	7
PD20	F320.09	img2	7
PD20	F320.09	img2	8
PD20	F320.09	img2	8
PD20	F320.09	img2	9
PD20	F320.09	img2	11
PD20	F320.09	img2	11
PD20	F320.09	img2	12
PD20	F320.09	img2	13
PD20	F320.09	img2	15
PD20	F320.09	img2	15
PD20	F320.09	img2	15
PD20	F320.09	img2	16
PD20	F320.09	img2	16
PD20	F320.09	img2	19
PD20	F320.09	img2	20
PD20	F320.09	img2	20
PD20	F320.09	img2	21
PD20	F320.09	img2	22
PD20	F320.09	img2	29
PD20	F320.09	img2	31
PD20	F320.09	img2	31
PD20	F320.09	img2	42
PD20	F320.09	img2	43
PD20	F320.09	img2	45
PD20	F320.09	img2	47
PD20	F320.09	img2	50
PD20	F320.09	img2	52
PD20	F320.09	img2	58
PD20	F320.09	img2	59
PD20	F320.09	img2	68
PD20	F320.09	img2	68
PD20	F320.09	img2	78
PD20	F320.09	img2	79
PD20	F320.09	img2	81
PD20	F320.09	img2	81
PD20	F320.09	img3	0
PD20	F320.09	img3	0
PD20	F320.09	img3	0
PD20	F320.09	img3	0
PD20	F320.09	img3	0
PD20	F320.09	img3	1
PD20	F320.09	img3	1
PD20	F320.09	img3	1
PD20	F320.09	img3	1
PD20	F320.09	img3	1
PD20	F320.09	img3	1
PD20	F320.09	img3	2
PD20	F320.09	img3	2
PD20	F320.09	img3	2
PD20	F320.09	img3	2
PD20	F320.09	img3	2
PD20	F320.09	img3	2
PD20	F320.09	img3	3
PD20	F320.09	img3	3
PD20	F320.09	img3	3
PD20	F320.09	img3	3
PD20	F320.09	img3	3
PD20	F320.09	img3	4
PD20	F320.09	img3	4
PD20	F320.09	img3	4
PD20	F320.09	img3	4
PD20	F320.09	img3	5
PD20	F320.09	img3	6
PD20	F320.09	img3	6
PD20	F320.09	img3	6
PD20	F320.09	img3	8
PD20	F320.09	img3	8
PD20	F320.09	img3	8
PD20	F320.09	img3	9
PD20	F320.09	img3	9
PD20	F320.09	img3	9
PD20	F320.09	img3	9
PD20	F320.09	img3	10
PD20	F320.09	img3	10
PD20	F320.09	img3	12
PD20	F320.09	img3	12
PD20	F320.09	img3	12
PD20	F320.09	img3	12
PD20	F320.09	img3	13
PD20	F320.09	img3	14
PD20	F320.09	img3	16
PD20	F320.09	img3	17
PD20	F320.09	img3	19
PD20	F320.09	img3	21
PD20	F320.09	img3	21
PD20	F320.09	img3	29
PD20	F320.09	img3	30
PD20	F320.09	img3	32
PD20	F320.09	img3	32
PD20	F320.09	img3	34
PD20	F320.09	img3	36
PD20	F320.09	img3	38
PD20	F320.09	img3	41
PD20	F320.09	img3	46
PD20	F320.09	img3	47
PD20	F320.09	img3	50
PD20	F320.09	img3	51
PD20	F320.09	img3	64
PD20	F320.09	img3	71
PD20	F320.09	img4	0
PD20	F320.09	img4	0
PD20	F320.09	img4	0
PD20	F320.09	img4	0
PD20	F320.09	img4	0
PD20	F320.09	img4	0
PD20	F320.09	img4	0
PD20	F320.09	img4	0
PD20	F320.09	img4	0
PD20	F320.09	img4	1
PD20	F320.09	img4	1
PD20	F320.09	img4	1
PD20	F320.09	img4	1
PD20	F320.09	img4	1
PD20	F320.09	img4	1
PD20	F320.09	img4	1
PD20	F320.09	img4	1
PD20	F320.09	img4	1
PD20	F320.09	img4	2
PD20	F320.09	img4	2
PD20	F320.09	img4	2
PD20	F320.09	img4	3
PD20	F320.09	img4	3
PD20	F320.09	img4	3
PD20	F320.09	img4	3
PD20	F320.09	img4	4
PD20	F320.09	img4	5
PD20	F320.09	img4	5
PD20	F320.09	img4	5
PD20	F320.09	img4	5
PD20	F320.09	img4	6
PD20	F320.09	img4	7
PD20	F320.09	img4	7
PD20	F320.09	img4	7
PD20	F320.09	img4	8
PD20	F320.09	img4	9
PD20	F320.09	img4	9
PD20	F320.09	img4	10
PD20	F320.09	img4	11
PD20	F320.09	img4	12
PD20	F320.09	img4	15
PD20	F320.09	img4	16
PD20	F320.09	img4	16
PD20	F320.09	img4	16
PD20	F320.09	img4	16
PD20	F320.09	img4	17
PD20	F320.09	img4	17
PD20	F320.09	img4	18
PD20	F320.09	img4	20
PD20	F320.09	img4	21
PD20	F320.09	img4	27
PD20	F320.09	img4	27
PD20	F320.09	img4	30
PD20	F320.09	img4	31
PD20	F320.09	img4	33
PD20	F320.09	img4	33
PD20	F320.09	img4	34
PD20	F320.09	img4	36
PD20	F320.09	img4	62
PD20	F320.09	img4	69
PD20	F320.09	img4	72
PD20	F320.09	img5	0
PD20	F320.09	img5	1
PD20	F320.09	img5	1
PD20	F320.09	img5	2
PD20	F320.09	img5	2
PD20	F320.09	img5	2
PD20	F320.09	img5	2
PD20	F320.09	img5	2
PD20	F320.09	img5	2
PD20	F320.09	img5	3
PD20	F320.09	img5	4
PD20	F320.09	img5	4
PD20	F320.09	img5	5
PD20	F320.09	img5	5
PD20	F320.09	img5	5
PD20	F320.09	img5	5
PD20	F320.09	img5	5
PD20	F320.09	img5	6
PD20	F320.09	img5	6
PD20	F320.09	img5	6
PD20	F320.09	img5	7
PD20	F320.09	img5	8
PD20	F320.09	img5	8
PD20	F320.09	img5	10
PD20	F320.09	img5	11
PD20	F320.09	img5	11
PD20	F320.09	img5	12
PD20	F320.09	img5	12
PD20	F320.09	img5	14
PD20	F320.09	img5	15
PD20	F320.09	img5	16
PD20	F320.09	img5	18
PD20	F320.09	img5	20
PD20	F320.09	img5	20
PD20	F320.09	img5	21
PD20	F320.09	img5	31
PD20	F320.09	img5	37
PD20	F320.09	img5	48
PD20	F320.09	img5	49
PD20	F320.09	img5	53
PD21	F283.01	img1	0
PD21	F283.01	img1	1
PD21	F283.01	img1	2
PD21	F283.01	img1	5
PD21	F283.01	img1	5
PD21	F283.01	img1	6
PD21	F283.01	img1	7
PD21	F283.01	img1	7
PD21	F283.01	img1	10
PD21	F283.01	img1	10
PD21	F283.01	img1	10
PD21	F283.01	img1	10
PD21	F283.01	img1	11
PD21	F283.01	img1	11
PD21	F283.01	img1	11
PD21	F283.01	img1	11
PD21	F283.01	img1	12
PD21	F283.01	img1	12
PD21	F283.01	img1	13
PD21	F283.01	img1	14
PD21	F283.01	img1	14
PD21	F283.01	img1	15
PD21	F283.01	img1	16
PD21	F283.01	img1	17
PD21	F283.01	img1	20
PD21	F283.01	img1	20
PD21	F283.01	img1	20
PD21	F283.01	img1	21
PD21	F283.01	img1	22
PD21	F283.01	img1	23
PD21	F283.01	img1	24
PD21	F283.01	img1	25
PD21	F283.01	img1	25
PD21	F283.01	img1	26
PD21	F283.01	img1	26
PD21	F283.01	img1	29
PD21	F283.01	img1	29
PD21	F283.01	img1	32
PD21	F283.01	img1	39
PD21	F283.01	img1	39
PD21	F283.01	img1	45
PD21	F283.01	img1	45
PD21	F283.01	img1	51
PD21	F283.01	img1	53
PD21	F283.01	img1	55
PD21	F283.01	img1	58
PD21	F283.01	img1	58
PD21	F283.01	img1	60
PD21	F283.01	img1	61
PD21	F283.01	img1	73
PD21	F283.01	img1	81
PD21	F283.01	img1	75
PD21	F283.01	img1	65
PD21	F283.01	img2	0
PD21	F283.01	img2	0
PD21	F283.01	img2	0
PD21	F283.01	img2	0
PD21	F283.01	img2	1
PD21	F283.01	img2	2
PD21	F283.01	img2	3
PD21	F283.01	img2	3
PD21	F283.01	img2	4
PD21	F283.01	img2	4
PD21	F283.01	img2	4
PD21	F283.01	img2	4
PD21	F283.01	img2	5
PD21	F283.01	img2	5
PD21	F283.01	img2	5
PD21	F283.01	img2	6
PD21	F283.01	img2	6
PD21	F283.01	img2	6
PD21	F283.01	img2	6
PD21	F283.01	img2	8
PD21	F283.01	img2	8
PD21	F283.01	img2	8
PD21	F283.01	img2	8
PD21	F283.01	img2	9
PD21	F283.01	img2	10
PD21	F283.01	img2	10
PD21	F283.01	img2	11
PD21	F283.01	img2	11
PD21	F283.01	img2	11
PD21	F283.01	img2	11
PD21	F283.01	img2	12
PD21	F283.01	img2	12
PD21	F283.01	img2	13
PD21	F283.01	img2	13
PD21	F283.01	img2	14
PD21	F283.01	img2	14
PD21	F283.01	img2	14
PD21	F283.01	img2	15
PD21	F283.01	img2	17
PD21	F283.01	img2	18
PD21	F283.01	img2	21
PD21	F283.01	img2	22
PD21	F283.01	img2	23
PD21	F283.01	img2	24
PD21	F283.01	img2	24
PD21	F283.01	img2	25
PD21	F283.01	img2	26
[truncated: 1,890 more rows]
