# Supplementary material for: Skin vasculature and hair follicle cross-talking associated with stem cell activation and tissue homeostasis
Source: eLife journal article supplement (doi:10.7554/elife.45977), 2019-07-25
Supplement: supp [file elife-45977-supp-v1.zip › elife_poa_e45977_Figure_3_source_data_1.xlsx]

## Sheet: Sheet1
	Ki67 (# of Ki67+/CD31+ nuclei)
	PD19	PD19	PD19	PD20	PD20	PD20	PD21	PD21	PD21	PD28	PD28	PD28
	F284.02	F320.04	F320.06	F284.03	F284.04	F320.09	F283.01	F283.02	F305.01	F283.03	F283.04	F305.04
	M	F	M	F	M	F	F	F	F	M	F	F
field1	0	2	0	2	1	1	0	2	1	27	25	21
field2	0	0	0	1	0	1	2	0	1	18	7	27
field3	0	0	1	1	0	3	1	0	3	28	19	27
field4	0	0	0	1	2	1	1	1	2	16	17	17
field5	1	0	0	4	1	0	0	0	1	27	36	15
field6	1	0	0	2	2	1	1	1	0	18	36	19
field7	1	2	0	1	1	2	1	2	2	32	31	9
field8	1	1	0	3	0	0	0	0	3	23	13	5
Sum	4	5	1	15	7	9	6	6	13	189	184	140
Average	0.5	0.625	0.125	1.875	0.875	1.125	0.75	0.75	1.625	23.625	23	17.5
Stdev	0.534522	0.916125	0.353553	1.12599	0.834523	0.991031	0.707107	0.886405	1.06066	5.7802	10.7836	7.83764
						Section1				Ki67 are more often seen closer to the bottom of the hair follicles
