# Supplementary material for: Skin vasculature and hair follicle cross-talking associated with stem cell activation and tissue homeostasis
Source: eLife journal article supplement (doi:10.7554/elife.45977), 2019-07-25
Supplement: supp [file elife-45977-supp-v1.zip › elife_poa_e45977_Figure_5_source_data_1.xlsx]

## Sheet: Alk1 BV (JMP)
Mouse ID	Age	Sex	Stage	Genotype	BV
F520.01	PD20	M	Telogen	CT	8344.61
F520.01	PD20	M	Telogen	CT	6224.58
F520.01	PD20	M	Telogen	CT	2491.84
F520.01	PD20	M	Telogen	CT	10411.9
F520.01	PD20	M	Telogen	CT	7726.48
F520.01	PD20	M	Telogen	CT	9653.41
F520.05	PD20	M	Telogen	CT	6284.08
F520.05	PD20	M	Telogen	CT	6687.26
F520.05	PD20	M	Telogen	CT	9135.71
F520.05	PD20	M	Telogen	CT	4085.94
F520.05	PD20	M	Telogen	CT	7566.17
F520.05	PD20	M	Telogen	CT	5271.27
F520.04	PD20	F	Telogen	CT	4882.13
F520.04	PD20	F	Telogen	CT	6555.98
F520.04	PD20	F	Telogen	CT	5744.2
F520.04	PD20	F	Telogen	CT	5518.78
F520.04	PD20	F	Telogen	CT	5567.42
F520.06	PD20	F	Telogen	CT	6948.6
F520.06	PD20	F	Telogen	CT	5759.75
F520.06	PD20	F	Telogen	CT	5842.22
F520.06	PD20	F	Telogen	CT	5508.91
F86.04	PD25	F	Telogen	KO	18779
F86.04	PD25	F	Telogen	KO	19945.6
F86.04	PD25	F	Telogen	KO	17921.6
F86.04	PD25	F	Telogen	KO	18908.1
F86.04	PD25	F	Telogen	KO	18978.6
F99.01	PD25	M	Telogen	KO	25025.6
F99.01	PD25	M	Telogen	KO	21932.6
F99.01	PD25	M	Telogen	KO	21364.7
F99.01	PD25	M	Telogen	KO	20064.1
F433.06	PD25	F	Telogen	KO	8274.42
F433.06	PD25	F	Telogen	KO	7618.9
F433.06	PD25	F	Telogen	KO	9389.78
F433.06	PD25	F	Telogen	KO	12006.2
F433.06	PD25	F	Telogen	KO	14794.2
F80.04	PD28	F	Tel-Ana	CT	2534.88
F80.04	PD28	F	Tel-Ana	CT	4018.17
F80.04	PD28	F	Tel-Ana	CT	3943.47
F80.04	PD28	F	Tel-Ana	CT	5456.4
F80.04	PD28	F	Tel-Ana	CT	4433.46
F333.04	PD28	M	Tel-Ana	CT	3460.06
F333.04	PD28	M	Tel-Ana	CT	2322.26
F333.04	PD28	M	Tel-Ana	CT	3372.56
F333.04	PD28	M	Tel-Ana	CT	4125.92
F333.04	PD28	M	Tel-Ana	CT	3248.13
F433.03	PD25	F	Tel-Ana	CT	5789.78
F433.03	PD25	F	Tel-Ana	CT	4936.33
F433.03	PD25	F	Tel-Ana	CT	5518.61
F433.03	PD25	F	Tel-Ana	CT	4444.19
F433.03	PD25	F	Tel-Ana	CT	3808.78
F80.03	PD28	M	Tel-Ana	KO	21279.2
F80.03	PD28	M	Tel-Ana	KO	11442.9
F80.03	PD28	M	Tel-Ana	KO	12870.8
F80.03	PD28	M	Tel-Ana	KO	13160.7
F80.03	PD28	M	Tel-Ana	KO	13210.9
F80.03	PD28	M	Tel-Ana	KO	10296
F90.02	PD28	F	Tel-Ana	KO	10803.3
F90.02	PD28	F	Tel-Ana	KO	10547.1
F90.02	PD28	F	Tel-Ana	KO	10059.8
F90.02	PD28	F	Tel-Ana	KO	9637.98
F90.02	PD28	F	Tel-Ana	KO	7189.61
F90.02	PD28	F	Tel-Ana	KO	7365.48
F11.04	PD28	F	Tel-Ana	KO	14661.1
F11.04	PD28	F	Tel-Ana	KO	17720.8
F11.04	PD28	F	Tel-Ana	KO	20146.5
F11.04	PD28	F	Tel-Ana	KO	12666.7
F11.04	PD28	F	Tel-Ana	KO	15235.5
