# Supplementary material for: Skin vasculature and hair follicle cross-talking associated with stem cell activation and tissue homeostasis
Source: eLife journal article supplement (doi:10.7554/elife.45977), 2019-07-25
Supplement: supp [file elife-45977-supp-v1.zip › elife_poa_e45977_Figure_6_source_data_1.xlsx]

## Sheet: Alk1 MeanInt - JMP
Mouse ID	Genotype		HPuHG Avg Int (Raw)	Avg Background	HPuHG Avg	Avg BMP4 in CD31+ Int (Raw)	Avg BMP4 in CD31+ Int
F81.06	CT	img1	27.424	19.484	7.94	41.326	21.842
F81.06	CT	img2	26.193	14.173	12.02	36.229	22.056
F81.06	CT	img3	24.046	16.812	7.234	36.52	19.708
F81.06	CT	img4	33.357	16.107	17.25	40.31	24.203
F81.06	CT	img5	27.962	14.005	13.957	39.426	25.421
F81.06	CT	img6	22.829	14.165	8.664	32.867	18.702
F81.06	CT	img7	24.876	15.17	9.706	33.913	18.743
F81.06	CT	img8	30.709	22.263	8.446	42.974	20.711
F81.06	CT	img9	25.016	19.008	6.008	39.139	20.131
F81.06	CT	img10	35.244	22.946	12.298	55.904	32.958
F90.02	KO	img1	30.567	8.541	22.026	31.804	23.263
F90.02	KO	img2	38.453	11.254	27.199	40.463	29.209
F90.02	KO	img3	32.804	8.293	24.511	43.134	34.841
F90.02	KO	img4	38.326	8.416	29.91	49.855	41.439
F90.02	KO	img5	22.959	4.256	18.703	34.508	30.252
F90.02	KO	img6	26.494	5.491	21.003	32.722	27.231
F90.02	KO	img7	19.023	5.48	13.543	29.386	23.906
F90.02	KO	img8	37.831	12.927	24.904	42.326	29.399
F90.02	KO	img9	17.977	5.951	12.026	24.173	18.222
F90.02	KO	img10	27.524	8.457	19.067	38.023	29.566
F333.04	CT	img1	22.415	9.762	12.653	55	45.238
F333.04	CT	img2	19.149	5.157	13.992	35.368	30.211
F333.04	CT	img3	16.901	6.898	10.003	32.904	26.006
F333.04	CT	img4	31.087	11.091	19.996	56.814	45.723
F333.04	CT	img5	29.385	14.736	14.649	45.622	30.886
F333.04	CT	img6	18.145	11.254	6.891	35.702	24.448
F333.04	CT	img7	30.004	9.907	20.097	48.348	38.441
F333.04	CT	img8	31.21	11.708	19.502	48.944	37.236
F333.04	CT	img9	38.041	16.999	21.042	54.611	37.612
F333.02	KO	img1	41.515	10.673	30.842	56.23	45.557
F333.02	KO	img2	56.002	17.807	38.195	77.739	59.932
F333.02	KO	img3	35.993	8.62	27.373	53.731	45.111
F333.02	KO	img4	43.206	8.62	34.586	62.164	53.544
F333.02	KO	img5	48.41	10.654	37.756	70.593	59.939
F333.02	KO	img6	33.806	16.202	17.604	45.914	29.712
F333.02	KO	img7	27.861	10.501	17.36	43.095	32.594
F333.02	KO	img8	26.478	6.279	20.199	35.716	29.437
F333.02	KO	img9	23.317	5.695	17.622	38.225	32.53
F333.02	KO	img10	31.384	13.232	18.152	46.302	33.07
F80.04	CT	img1	23.877	13.72	10.157	29.285	15.565
F80.04	CT	img2	23.286	12.858	10.428	28.981	16.123
F80.04	CT	img3	22.438	11.116	11.322	37.872	26.756
F80.04	CT	img4	17.666	8.647	9.019	25.229	16.582
F80.04	CT	img5	18.185	10.398	7.787	33.718	23.32
F80.04	CT	img6	20.751	10.3	10.451	18.75	8.45
F80.04	CT	img7	14.93	7.303	7.627	25.277	17.974
F80.04	CT	img8	19.512	5.981	13.531	30.231	24.25
F80.04	CT	img9	12.062	6.59	5.472	30.223	23.633
F80.03	KO	img1	34.405	8.174	26.231	42.284	34.11
F80.03	KO	img2	28.601	9.764	18.837	34.248	24.484
F80.03	KO	img3	28.691	8.903	19.788	41.227	32.324
F80.03	KO	img4	25.74	9.622	16.118	33.83	24.208
F80.03	KO	img5	35.48	10.197	25.283	45.342	35.145
F80.03	KO	img6	40.376	14.296	26.08	51.409	37.113
F80.03	KO	img7	35.46	11.65	23.81	40.453	28.803
F80.03	KO	img8	29.34	11.823	17.517	39.365	27.542
F80.03	KO	img9	34.016	11.503	22.513	44.308	32.805
F80.03	KO	img10	36.574	13.739	22.835	49.338	35.599
F80.03	KO	img11	53.874	19.865	34.009	64.923	45.058
F80.03	KO	img12	37.898	13.456	24.442	43.936	30.48
F80.03	KO	img13	44.723	15.274	29.449	59.952	44.678
F80.03	KO	img14	44.642	15.851	28.791	48.933	33.082
F80.03	KO	img15	38.781	12.774	26.007	45.778	33.004
F80.03	KO	img16	41.668	13.72	27.948	52.957	39.237
