# Supplementary material for: Skin vasculature and hair follicle cross-talking associated with stem cell activation and tissue homeostasis
Source: eLife journal article supplement (doi:10.7554/elife.45977), 2019-07-25
Supplement: supp [file elife-45977-supp-v1.zip › elife_poa_e45977_Figure_8_source_data_1.xlsx]

## Sheet: All data 1207 (add 1360 convers
Group	Cat	Mouse ID	Total Area	BV/Total Area	BV/Selected Area	Log(Total Area)	Log(BV/Total Area)	Log(BV/Selected Area)	BV selected area	BV total	Residual BV	Predicted BV	Log(BV)	Predicted Log(BV)	Residual Log(BV)	Log(BV selected)	BV selected area 1360	Total Area 1360
CT	Mid	D907.01	71205	0.0456569	0.0255654	4.85251	-1.34049	-1.59235	624	3251	-510.997	3762	3.51202	3.60211	-0.0900917	2.79518	2496	284820
CT	Mid	D907.01	77190	0.0939889	0.0546062	4.88756	-1.02692	-1.26276	1323	7255	3104.53	4150.47	3.86064	3.62949	0.231146	3.12156	5292	308760
CT	Mid	D907.01	110261	0.0797311	0.0405084	5.04242	-1.09837	-1.39245	988	8791.25	2494.18	6297.07	3.94405	3.75048	0.193574	2.99476	3952	441045
CT	Mid	D907.01	117289	0.0527586	0.0218546	5.06926	-1.27771	-1.66046	535	6188	-565.231	6753.23	3.79155	3.77144	0.0201092	2.72835	2140	469156
CT	Mid	D907.01	123954	0.0420156	0.0223368	5.09326	-1.37659	-1.65098	546	5208	-1977.84	7185.84	3.71667	3.79019	-0.0735226	2.73719	2184	495816
CT	High	D907.01	134818	0.0624507	0.0725388	5.12975	-1.20446	-1.13943	1775.75	8419.5	528.476	7891.02	3.92529	3.8187	0.106587	3.24938	7103	539273
CT	High	D907.01	142656	0.0603622	0.065844	5.15429	-1.21923	-1.18148	1604.75	8611	211.273	8399.73	3.93505	3.83787	0.0971822	3.20541	6419	570622
CT	High	D907.01	152480	0.0533119	0.0792833	5.18321	-1.27318	-1.10082	1938	8129	-908.418	9037.42	3.91004	3.86047	0.0495687	3.28735	7752	609920
CT	High	D907.01	156163	0.0809987	0.0564569	5.19358	-1.09152	-1.24828	1378	12649	3372.52	9276.48	4.10206	3.86857	0.23349	3.13925	5512	624652
CT	High	D907.01	162368	0.0517035	0.0267474	5.2105	-1.28648	-1.57272	649	8395	-1284.23	9679.23	3.92402	3.88179	0.042234	2.81224	2596	649472
CT	Low	E18.05	56766	0.0399887	0.0641823	4.75409	-1.39806	-1.19259	1564.25	2270	-554.787	2824.79	3.35603	3.52522	-0.169191	3.19431	6257	227064
CT	Low	E18.05	70058.8	0.0416044	0.0921698	4.84546	-1.38086	-1.03541	2234.75	2914.75	-772.846	3687.6	3.4646	3.5966	-0.132001	3.34923	8939	280235
CT	Low	E18.05	72411.2	0.0582506	0.0760812	4.85981	-1.2347	-1.11872	1854.25	4218	377.707	3840.29	3.62511	3.60781	0.0172983	3.26817	7417	289645
CT	Low	E18.05	74264.5	0.0360031	0.044537	4.87078	-1.44366	-1.35128	1082.25	2673.75	-1286.83	3960.58	3.42712	3.61638	-0.189262	3.03433	4329	297058
CT	Mid	E18.05	80934.8	0.0655435	0.0377876	4.90814	-1.18347	-1.42265	923	5304.75	911.211	4393.54	3.72466	3.64557	0.0790999	2.9652	3692	323739
CT	Mid	E18.05	83253.5	0.0462743	0.049344	4.9204	-1.33466	-1.30677	1203.5	3852.5	-691.545	4544.04	3.58574	3.65515	-0.0694063	3.08045	4814	333014
CT	Mid	E18.05	103474	0.0972469	0.0676955	5.01483	-1.01212	-1.16944	1654.75	10062.5	4205.99	5856.51	4.00271	3.72892	0.273786	3.21873	6619	413895
CT	High	E18.05	170500	0.0547829	0.0343529	5.23173	-1.26135	-1.46404	837.25	9340.5	-866.582	10207.1	3.97037	3.89837	0.0720018	2.92286	3349	682001
CT	High	E18.05	180988	0.0259754	0.019001	5.25765	-1.58544	-1.72122	462.75	4701.25	-6186.59	10887.8	3.67221	3.91862	-0.246409	2.66535	1851	723953
CT	High	E18.05	215356	0.042013	0.0106089	5.33316	-1.37662	-1.97433	258.75	9047.75	-4070.84	13118.6	3.95654	3.97761	-0.021071	2.41288	1035	861424
CT	Low	E19.03	37547.5	0.068147	0.0783284	4.57458	-1.16655	-1.10608	1913.25	2558.75	981.403	1577.35	3.40803	3.38498	0.0230504	3.28177	7653	150190
CT	Low	E19.03	38482.5	0.0540181	0.0216072	4.58526	-1.26746	-1.6654	527	2078.75	440.714	1638.04	3.3178	3.39332	-0.0755207	2.72181	2108	153930
CT	Low	E19.03	42195	0.0908638	0.0903086	4.62526	-1.04161	-1.04427	2201	3834	1954.99	1879.01	3.58365	3.42457	0.159081	3.34262	8804	168780
CT	Low	E19.03	42762	0.0480918	0.0712854	4.63106	-1.31793	-1.147	1742.5	2056.5	140.689	1915.81	3.31313	3.4291	-0.115971	3.24117	6970	171048
CT	Low	E19.03	46179	0.0716559	0.0912815	4.66444	-1.14475	-1.03962	2228	3309	1171.4	2137.6	3.5197	3.45518	0.0645138	3.34792	8912	184716
CT	Low	E19.03	46511.2	0.0632696	0.0475471	4.66756	-1.1988	-1.32288	1156.25	2942.75	783.582	2159.17	3.46875	3.45762	0.011138	3.06305	4625	186045
CT	Low	E19.03	51395.8	0.0286308	0.0312602	4.71093	-1.54317	-1.50501	763	1471.5	-1004.71	2476.21	3.16776	3.4915	-0.323737	2.88252	3052	205583
CT	Low	E19.03	56980	0.0442348	0.0777204	4.75572	-1.35424	-1.10946	1897	2520.5	-318.177	2838.68	3.40149	3.52649	-0.125007	3.27807	7588	227920
CT	Low	E19.03	59210.2	0.0554591	0.0364186	4.7724	-1.25603	-1.43868	888.25	3283.75	300.311	2983.44	3.51637	3.53952	-0.0231502	2.94854	3553	236841
KO	Low	D907.05	40357	0.175955	0.167689	4.60592	-0.754599	-0.775494	4099	7101	933.819	6167.18	3.85132	3.70732	0.144004	3.61268	16396	161428
KO	Low	D907.05	50262	0.142414	0.172493	4.70124	-0.846448	-0.763228	4204	7158	347.903	6810.1	3.85479	3.78178	0.0730068	3.62366	16816	201048
KO	Low	D907.05	56304	0.137575	0.139831	4.75054	-0.861462	-0.854396	3413	7746	543.727	7202.27	3.88908	3.8203	0.0687776	3.53314	13652	225216
KO	Low	D907.05	71804	0.104186	0.100336	4.85615	-0.982189	-0.998543	2449	7481	-727.352	8208.35	3.87396	3.90281	-0.0288471	3.38899	9796	287216
KO	Low	D907.05	73954	0.133948	0.109593	4.86896	-0.873063	-0.960217	2671	9906	1558.1	8347.9	3.9959	3.91282	0.0830815	3.42667	10684	295816
KO	Mid	D907.05	80036	0.0787146	0.193788	4.90329	-1.10394	-0.712673	4723	6300	-2442.68	8742.68	3.79934	3.93963	-0.140292	3.67422	18892	320144
KO	Mid	D907.05	86233	0.106224	0.1985	4.93567	-0.973778	-0.702238	4845	9160	15.0866	9144.91	3.9619	3.96494	-0.00303969	3.68529	19380	344932
KO	Mid	D907.05	88824	0.0855512	0.0676827	4.94853	-1.06777	-1.16952	1652	7599	-1714.09	9313.09	3.88076	3.97498	-0.0942231	3.21801	6608	355296
KO	Mid	D907.05	94337	0.0848978	0.101565	4.97468	-1.0711	-0.993256	2479	8009	-1661.93	9670.93	3.90358	3.99541	-0.0918321	3.39428	9916	377348
KO	Mid	D907.05	95287	0.089624	0.111725	4.97903	-1.04758	-0.951851	2731	8540	-1192.59	9732.59	3.93146	3.99881	-0.0673522	3.43632	10924	381148
KO	Mid	E19.04	78269	0.0934597	0.0890861	4.89359	-1.02938	-1.05019	2168	7315	-1312.98	8627.98	3.86421	3.93206	-0.0678431	3.33606	8672	313076
KO	Mid	E19.04	78577	0.108785	0.0400279	4.8953	-0.963431	-1.39764	977	8548	-99.9756	8647.98	3.93186	3.93339	-0.00152548	2.98989	3908	314308
KO	Mid	E19.04	79131	0.0991647	0.07484	4.89835	-1.00364	-1.12587	1824	7847	-836.935	8683.93	3.8947	3.93577	-0.0410701	3.26102	7296	316524
KO	Mid	E19.04	112971	0.0944756	0.0441249	5.05297	-1.02468	-1.35532	1077	10673	-207.431	10880.4	4.02829	4.05657	-0.0282837	3.03222	4308	451884
KO	Mid	E19.04	127270	0.0557162	0.0525103	5.10473	-1.25402	-1.27976	1276	7091	-4717.55	11808.6	3.85071	4.09701	-0.246299	3.10585	5104	509080
KO	Mid	E19.04	128643	0.103915	0.0581932	5.10939	-0.98332	-1.23513	1412	13368	1470.33	11897.7	4.12607	4.10065	0.025419	3.14983	5648	514572
KO	High	E19.04	135736	0.104991	0.0375143	5.1327	-0.97885	-1.4258		14251	1892.93	12358.1	4.15385	4.11886	0.034988			542944
KO	High	E19.04	145428	0.115782	0.0802606	5.16265	-0.936358	-1.0955	1959	16838	3850.84	12987.2	4.22629	4.14226	0.0840325	3.29203	7836	581712
KO	High	E19.04	159016	0.105235	0.0831282	5.20144	-0.977841	-1.08025	2026	16734	2864.87	13869.1	4.2236	4.17256	0.0510351	3.30664	8104	636064
KO	High	E19.04	159515	0.1793	0.0635038	5.2028	-0.74642	-1.1972	1550	28601	14699.5	13901.5	4.45638	4.17363	0.282753	3.19033	6200	638060
KO	High	E19.04	177869	0.0566372	0.098642	5.2501	-1.2469	-1.00594	2397	10074	-5018.85	15092.8	4.0032	4.21058	-0.207378	3.37967	9588	711476
KO	Low	E19.09	30151	0.104706	0.106604	4.4793	-0.980027	-0.972225	2602	3157	-2347.73	5504.73	3.49927	3.6084	-0.109122	3.41531	10408	120604
KO	Low	E19.09	33045	0.140505	0.162593	4.51911	-0.852307	-0.788899	3951	4643	-1049.57	5692.57	3.6668	3.63949	0.0273052	3.59671	15804	132180
KO	Low	E19.09	36051	0.128651	0.210211	4.55692	-0.890587	-0.677344	5093	4638	-1249.69	5887.69	3.66633	3.66903	-0.00270284	3.70697	20372	144204
KO	Low	E19.09	37101	0.172152	0.145536	4.56939	-0.764089	-0.83703	3547	6387	431.16	5955.84	3.8053	3.67877	0.126523	3.54986	14188	148404
KO	Low	E19.09	39998	0.185034	0.198576	4.60204	-0.732748	-0.702073	4854	7401	1257.12	6143.88	3.86929	3.70428	0.165006	3.6861	19416	159992
KO	Low	E19.09	40421	0.144653	0.216454	4.60661	-0.839674	-0.664635	5291	5847	-324.335	6171.34	3.76693	3.70785	0.0590796	3.72354	21164	161684
KO	Low	E19.09	47411	0.12282	0.169744	4.67588	-0.910732	-0.770206	4137	5823	-802.044	6625.04	3.76515	3.76197	0.00317483	3.61669	16548	189644
KO	Low	E19.09	56651	0.145134	0.155629	4.75321	-0.83823	-0.807908	3793	8222	997.204	7224.8	3.91498	3.82238	0.092593	3.57898	15172	226604
KO	Low	E19.09	58212	0.135075	0.199771	4.76501	-0.869424	-0.699468	4876	7863	536.882	7326.12	3.89559	3.83161	0.0639812	3.68806	19504	232848
KO	Low	E19.09	68138	0.113211	0.124466	4.83339	-0.94611	-0.90495	3029	7714	-256.398	7970.4	3.88728	3.88503	0.00225348	3.4813	12116	272552
KO	Low	E19.10	40894	0.199858	0.217134	4.61166	-0.699278	-0.663271	5292	8173	1970.96	6202.04	3.91238	3.7118	0.200581	3.72362	21168	163576
KO	Low	E19.10	44949	0.0994015	0.165518	4.65272	-1.00261	-0.781155	4034	4468	-1997.24	6465.24	3.65011	3.74388	-0.0937659	3.60574	16136	179796
KO	Low	E19.10	54717	0.116509	0.198861	4.73812	-0.933642	-0.701451	4818	6375	-724.264	7099.26	3.80448	3.8106	-0.00611896	3.68287	19272	218868
KO	Low	E19.10	55412	0.0911716	0.0795908	4.7436	-1.04014	-1.09914	1914	5052	-2092.38	7144.38	3.70346	3.81488	-0.111418	3.28194	7656	221648
KO	Low	E19.10	77338	0.071737	0.0826358	4.88839	-1.14426	-1.08283	2014	5548	-3019.55	8567.55	3.74414	3.928	-0.183861	3.30406	8056	309352
KO	Mid	E19.10	85117.5	0.0846683	0.0647157	4.93002	-1.07228	-1.18899	1577.25	7206.75	-1865.76	9072.51	3.85774	3.96052	-0.102778	3.1979	6309	340470
KO	Mid	E19.10	88345.5	0.128343	0.172989	4.94618	-0.891629	-0.761981	4206.75	11338.5	2056.47	9282.03	4.05456	3.97315	0.0814088	3.62395	16827	353382
KO	Mid	E19.10	94232	0.0994965	0.137703	4.9742	-1.00219	-0.861056	3338.75	9375.75	-288.365	9664.11	3.97201	3.99503	-0.0230266	3.52358	13355	376928
KO	Mid	E19.10	118532	0.0984713	0.0932628	5.07384	-1.00669	-1.03029	2273	11672	430.614	11241.4	4.06715	4.07287	-0.00572842	3.3566	9092	474128
KO	Mid	E19.10	121798	0.095268	0.116834	5.08564	-1.02105	-0.932432	2832.75	11603.5	150.091	11453.4	4.06459	4.0821	-0.0175083	3.45221	11331	487194
