# Supplementary material for: Skin vasculature and hair follicle cross-talking associated with stem cell activation and tissue homeostasis
Source: eLife journal article supplement (doi:10.7554/elife.45977), 2019-07-25
Supplement: supp [file elife-45977-supp-v1.zip › elife_poa_e45977_Figure_8_source_data_2.xlsx]

## Sheet: Runx1 MeanInt - JMP
Mouse ID	Genotype	HPuHG Avg Int (Raw)	Avg Background	HPuHG Avg	Avg BMP4 in CD31+ Int (Raw)	Avg BMP4 in CD31+ Int
E18.01	CT	24.505	13.04	10.443	77.323	64.283
E18.01	CT	28.424	12.779	15.645	65.028	52.249
E18.01	CT	24.499	11.01	13.489	60.595	49.585
E18.01	CT	31.488	16.143	15.345	69.273	53.13
E18.01	CT	36.633	13.51	23.123	57.391	43.881
E18.01	CT	23.289	12.846	10.443	52.976	40.13
E18.07	CT	33.32	13.876	19.444	60.404	46.528
E18.07	CT	20.214	9.089	11.125	42.675	33.586
E18.07	CT	21.255	9.186	12.069	55.793	46.607
E18.07	CT	37.244	22.099	15.145	80.978	58.879
E18.07	CT	27.087	13.868	13.219	58.269	44.401
E18.07	CT	30.452	19.687	10.765	51.079	31.392
E18.07	CT	32.068	19.427	12.641	60.99	41.563
E18.06	KO	40.226	17.694	22.532	96.496	78.802
E18.06	KO	56.382	14.212	42.17	73.178	58.966
E18.06	KO	36.76	13.117	23.643	59.481	46.364
E18.06	KO	43.117	12.815	30.302	61.805	48.99
E18.06	KO	26.82	2.385	24.435	53.895	51.51
E18.06	KO	27.15	4.255	22.895	59.115	54.86
E18.06	KO	37.771	11.735	26.036	52.748	41.013
E18.08	KO	28.393	11.448	16.945	65.247	53.799
E18.08	KO	36.141	9.38	26.761	70.049	60.669
E18.08	KO	29.042	12.778	16.264	59.092	46.314
E18.08	KO	36.486	16.056	20.43	52.342	36.286
E18.08	KO	31.038	9.093	21.945	52.428	43.335
E18.08	KO	30.233	8.92	21.313	49.593	40.673
E18.08	KO	40.481	11.85	28.631	60.431	48.581
E18.08	KO	39.103	10.22	28.883	84.211	73.991
F269.03	CT	31.292	15.162	16.13	67.107	51.945
F269.03	CT	16.147	8.723	7.424	45.789	37.066
F269.03	CT	35.43	16.162	19.268	77.191	61.029
F269.03	CT	19.481	3.978	15.503	67.005	63.027
F269.03	CT	21.636	7.359	14.277	56.461	49.102
F269.01	KO	41.964	17.072	24.892	92.614	75.542
F269.01	KO	41.161	7.049	34.112	106.902	99.853
F269.01	KO	51.33	11.263	40.067	119.072	107.809
F269.01	KO	56.945	13.499	43.446	114.655	101.156
F269.01	KO	32.533	8.163	24.37	73.377	65.214
F269.02	KO	18.428	4.204	14.224	36.913	32.709
F269.02	KO	27.218	3.217	24.001	51.445	48.228
F269.02	KO	37.695	8.397	29.298	41.027	32.63
F269.02	KO	35.089	10.711	24.378	55.097	44.386
F269.02	KO	23.41	8.629	14.781	46.712	38.083
F269.02	KO	27.269	8.534	18.735	42.643	34.109
