# Supplementary figures and images for: Skin vasculature and hair follicle cross-talking associated with stem cell activation and tissue homeostasis
Source: eLife journal article supplement (doi:10.7554/elife.45977), 2019-07-25

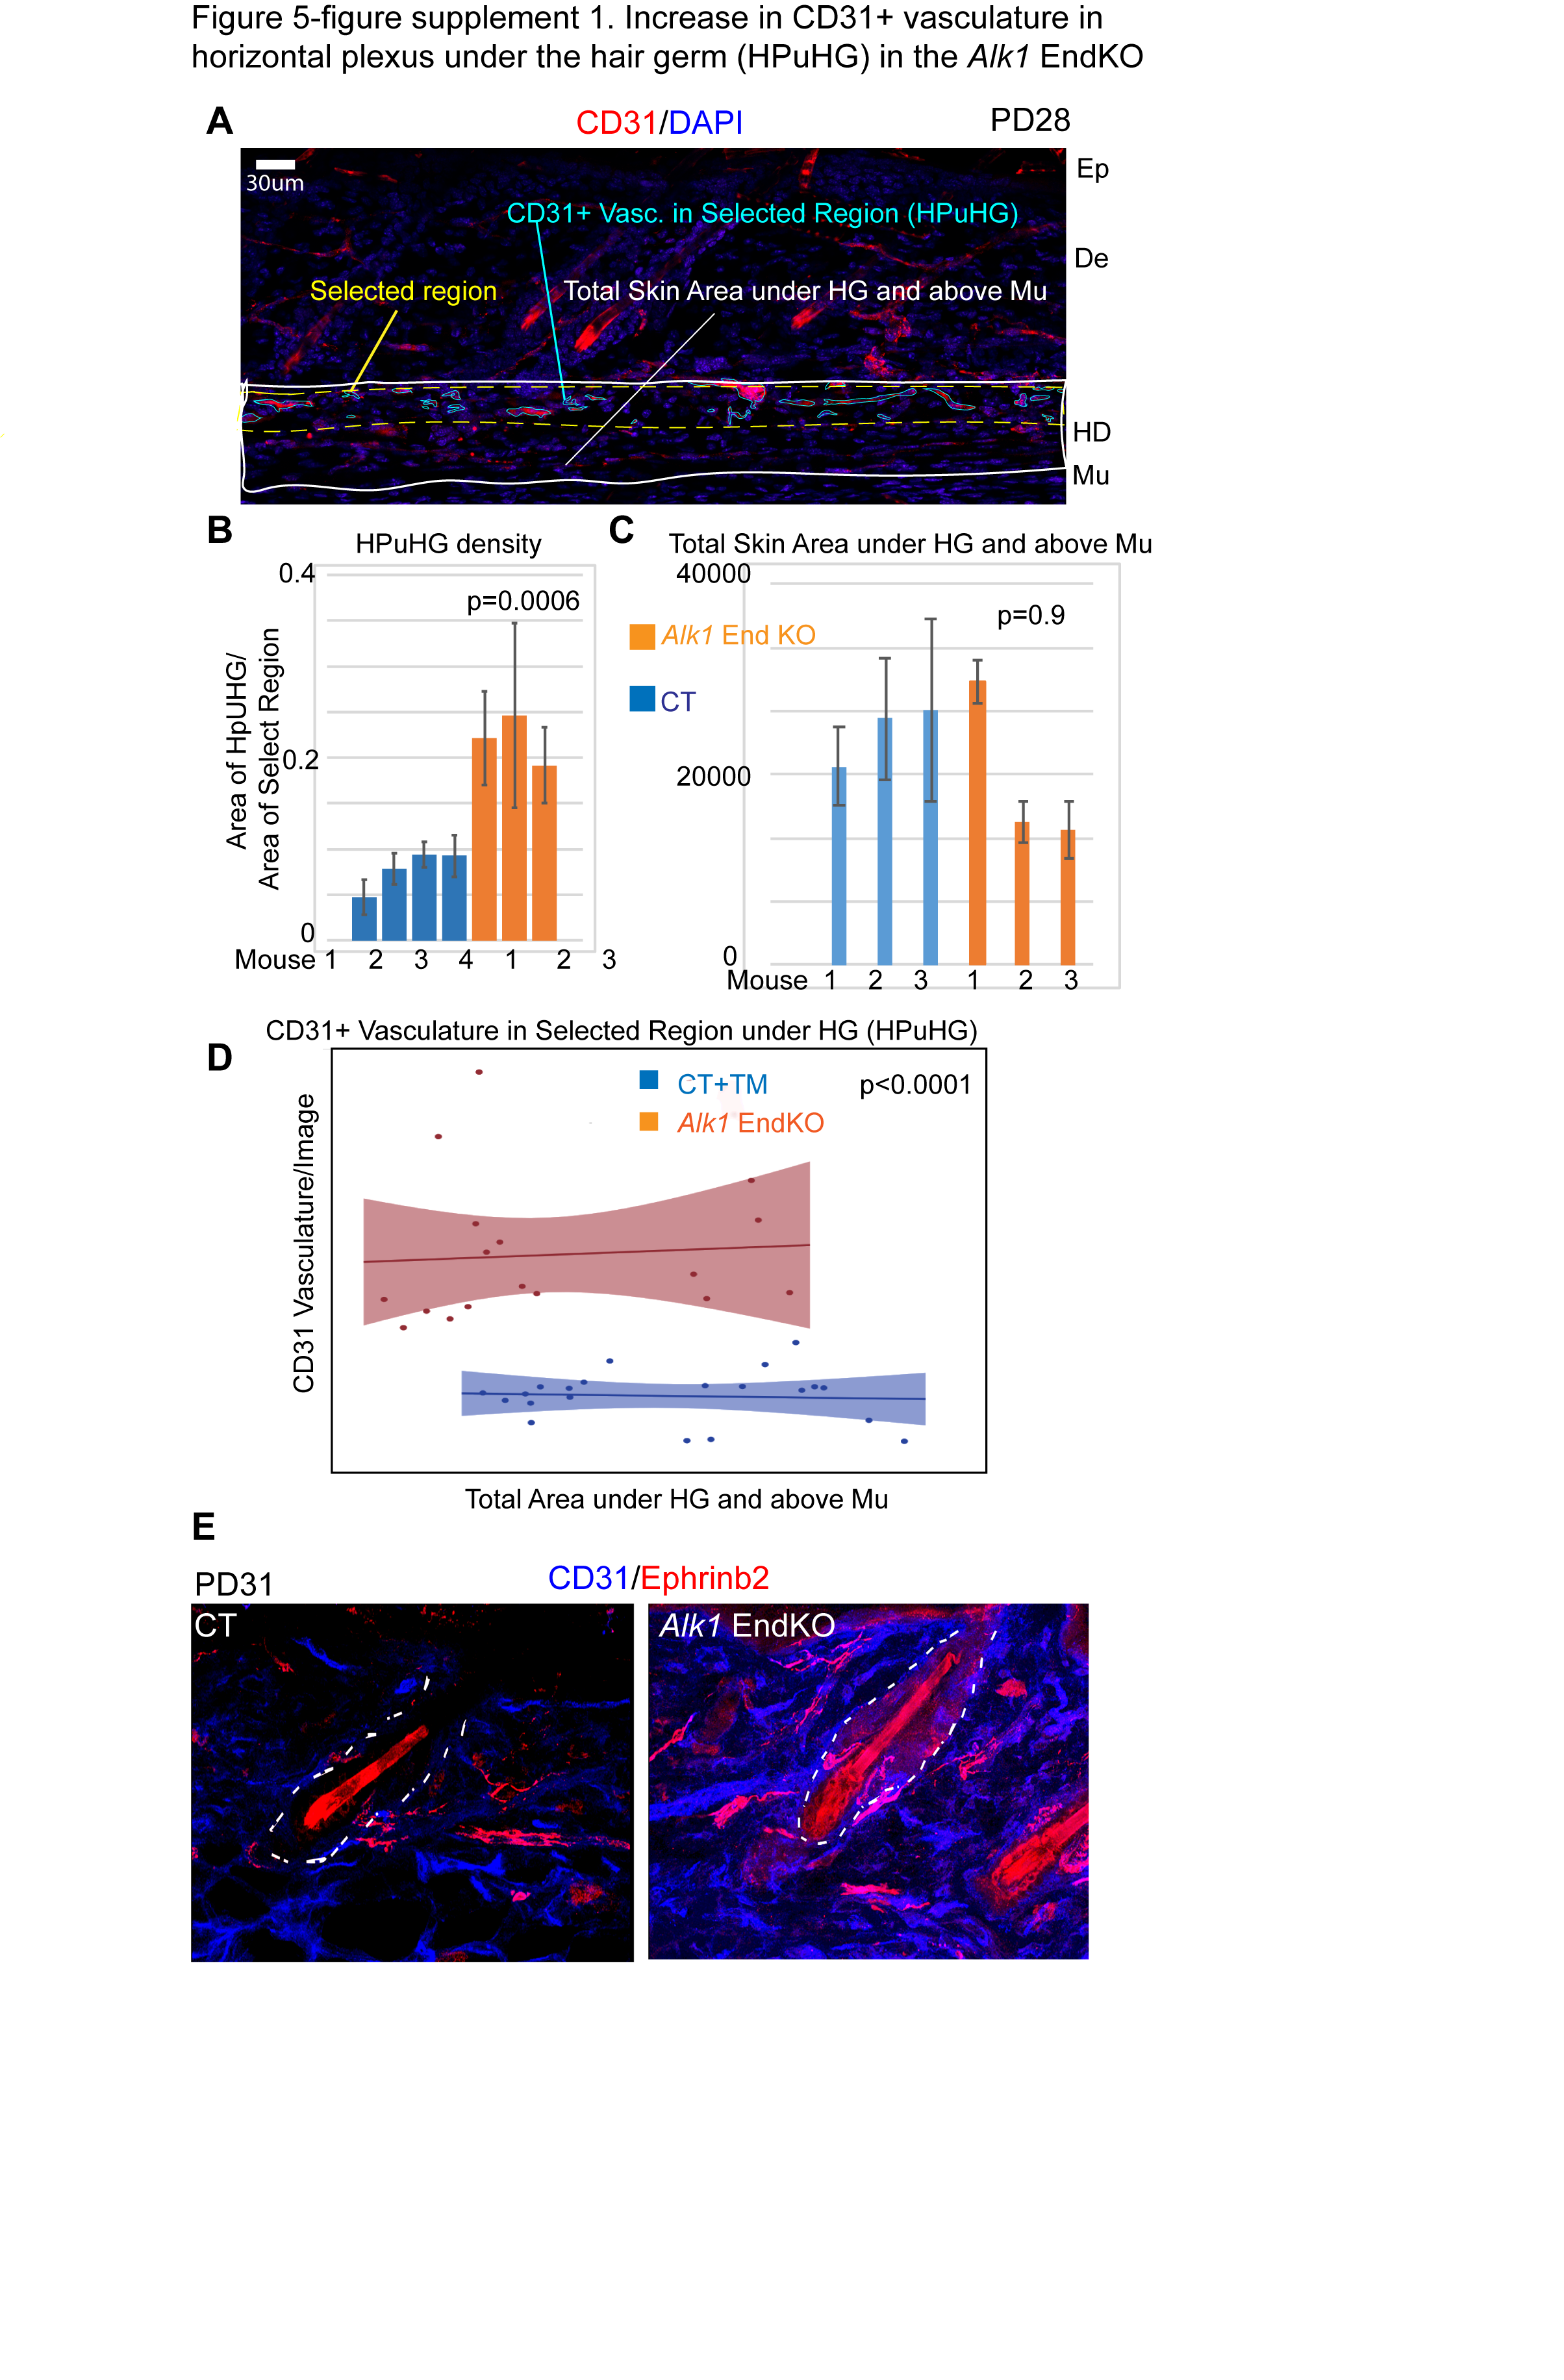

Supplement: supp [file elife-45977-supp-v1.zip › elife_poa_e45977_Figure_5_figure_supplement_1.tif]
